1 **Distinct roles of glutamine metabolism in benign and malignant cartilage tumors**  
2 **with *IDH* mutations.**

3

4 Hongyuan Zhang<sup>1,2</sup>, Vijitha Puvindran<sup>2</sup>, Puvindran Nadesan<sup>2</sup>, Xiruo Ding<sup>3</sup>, Leyao

5 Shen<sup>1,2,4</sup>, Yuning J. Tang<sup>5</sup>, Hidetoshi Tsushima<sup>6</sup>, Yasuhito Yahara<sup>7,8</sup>, Ga I Ban<sup>2</sup>, Guo-

6 Fang Zhang<sup>9,10</sup>, Courtney M. Karner<sup>1,2,4</sup>, Benjamin Alman<sup>1,2</sup>

7 1. Department of Cell Biology, Duke University, Durham, NC 27710, USA

8 2. Department of Orthopaedic Surgery Department, Duke University, Durham, NC  
9 27710, USA

10 3. Department of Biomedical Informatics and Medical Education, University of  
11 Washington, Seattle, WA 98195, USA

12 4. Department of Internal Medicine, University of Texas Southwestern Medical  
13 Center, Dallas, TX 75235, USA

14 5. Department of Genetics, Stanford, Stanford, CA 94305

15 6. Department of Orthopaedic Surgery, Kyushu University, Fukuoka, Japan

16 7. Department of Molecular and Medical Pharmacology, Faculty of Medicine,  
17 University of Toyama, Toyama, Japan

18 8. Department of Orthopaedic Surgery, Faculty of Medicine, University of Toyama,  
19 Toyama, Japan

20 9. Sarah W. Stedman Nutrition and Metabolism Center and Duke Molecular

21 Physiology Institute, Duke University Medical Center, Durham, NC 27701, USA

22 10. Department of Medicine, Endocrinology and Metabolism Division, Duke

23 University Medical Center, Durham, NC 27701, USA

24

25 **Abstract:**

26 Enchondromas and chondrosarcomas are common cartilage neoplasms that are either  
27 benign or malignant respectively. The majority of these tumors harbor mutations in  
28 either *IDH1* or *IDH2*. Glutamine metabolism has been implicated as a critical regulator  
29 of tumors with *IDH* mutations. Chondrocytes and chondrosarcomas with mutations in  
30 the *IDH1* or *IDH2* genes showed enhanced glutamine utilization in downstream  
31 metabolism. Using genetic and pharmacological approaches, we demonstrated that  
32 glutaminase-mediated glutamine metabolism played distinct roles in enchondromas and  
33 chondrosarcomas with *IDH1* or *IDH2* mutations. Deletion of glutaminase in  
34 chondrocytes with *Idh1* mutation increased the number and size of enchondroma-like  
35 lesions. Pharmacological inhibition of glutaminase in chondrosarcoma xenografts  
36 reduced overall tumor burden. Glutamine affected cell differentiation and viability in  
37 these tumors differently through different downstream metabolites. During murine  
38 enchondroma-like lesion development, glutamine-derived  $\alpha$ -ketoglutarate promoted  
39 hypertrophic chondrocyte differentiation and regulated chondrocyte proliferation. In  
40 human chondrosarcoma, glutamine-derived non-essential amino acids played an  
41 important role in preventing cell apoptosis. This study reveals that glutamine  
42 metabolism can play distinct roles in benign and malignant cartilage tumors sharing the  
43 same genetic mutations. Inhibiting GLS may provide a therapeutic approach to  
44 suppress chondrosarcoma tumor growth.

45

46 **Introduction:**

47 Enchondroma is a common benign cartilaginous neoplasm and is estimated to be  
48 present in 3% of the total population [1, 2]. These tumors develop from dysregulated  
49 chondrocyte differentiation in the growth plate and are mostly present in the metaphysis  
50 of long bones [3]. In patients with multiple enchondromatosis (more than one  
51 enchondroma lesions) such as Maffucci's syndrome and Ollier's disease, the risk of  
52 malignant transformation is reported to be up to 60% [4]. Chondrosarcoma is the  
53 second most common primary malignancy of the bone [4]. They arise *de novo* or  
54 develop from preexisting benign tumors including enchondromas [4]. High-grade  
55 chondrosarcomas have high metastatic potential and poor prognosis [5]. Currently there  
56 are no universally effective pharmacologic therapies for enchondromas or  
57 chondrosarcomas.

58

59 Somatic mutations of isocitrate dehydrogenase 1 and 2 (*IDH1* and *IDH2*) are the most  
60 frequent genetic variations in enchondromas and chondrosarcomas [6-10]. They are  
61 present in 56% - 90% of enchondroma tumors [6, 8], and in about 50% of  
62 chondrosarcoma tumors [7, 9]. Although *IDH1* or *IDH2* mutations are present in  
63 enchondromas and chondrosarcomas, it is not known whether these tumors share  
64 similar metabolic requirements for tumor development and cell viability. Wildtype *IDH1*  
65 and *IDH2* enzymes catalyze the reversible conversion between isocitrate and  $\alpha$ -  
66 ketoglutarate ( $\alpha$ -KG) in the cytoplasm or the mitochondria respectively. Mutant *IDH 1* or

67 IDH2 enzymes lose their original function and gain a neomorphic function that converts  
68  $\alpha$ -KG to D-2-hydroxyglutarate (D-2HG) [11-13]. D-2HG is considered as a putative  
69 “oncometabolite” in various cancers with mutations in *IDH1/2* [14-20]. Interestingly,  
70 pharmacological inhibition of mutant IDH1 enzyme did not alter chondrosarcoma  
71 tumorigenesis despite effective reduction of D-2HG synthesis [21]. Several clinical trials  
72 of mutant IDH inhibitors have been conducted in patients with chondrosarcoma [22].  
73 The results to date have been variable, showing at best stabilization of the disease [23].  
74 Recently, an investigation of the metabolomes in chondrosarcomas showed global  
75 alterations in cellular metabolism in *IDH1* or *IDH2* mutant chondrosarcomas, suggesting  
76 such alteration might drive the neoplastic phenotype, or be possible therapeutic targets  
77 for cancers with *IDH1* or *IDH2* mutations [24].

78  
79 Glutamine metabolism is an important metabolic pathway that is critical for the survival  
80 of various cancers as well as proper proliferation and differentiation of different cell  
81 types [25-31]. Glutamine metabolism starts when glutaminase (GLS) deaminates  
82 glutamine to glutamate. Glutamate could be further used to generate  $\alpha$ -ketoglutarate ( $\alpha$ -  
83 KG), glutathione, other non-essential amino acids, and nucleotides, etc. Through  
84 different downstream metabolites, glutamine regulates cancer cell behaviors by  
85 modulating bioenergetics, biosynthesis, redox homeostasis, etc. [26]. In cancers with  
86 *IDH1* or *IDH2* mutations, glutamine is utilized as the primary source for D-2HG  
87 production [11, 32, 33]. In addition, some tumors with *IDH1* or *IDH2* mutations are

88 reported to be dependent on glutamine metabolism for tumor growth or cell viability [34-  
89 37]. In non-cancerous cells, glutamine metabolism regulates cell differentiation mainly  
90 through many downstream metabolites including amino acids as well as  $\alpha$ -KG and  
91 acetyl-CoA which act as cofactors for various histone modifying enzymes [28, 30, 38,  
92 39].

93

94 In the context of cartilage tumors, it is unknown how glutamine regulates tumor  
95 development in enchondromas, and cancer cell survival in chondrosarcoma. We  
96 therefore used a genetically engineered mouse model of enchondromas and primary  
97 human chondrosarcoma samples to address these questions. Here we identified that  
98 GLS was upregulated in both human patient chondrosarcoma samples with mutations in  
99 *IDH1* or *IDH2* and murine chondrocytes with *Idh1* mutation. However, deleting *Gls* in the  
100 mouse led to an increased number and size of benign tumor-like lesions and affected  
101 hypertrophic chondrocyte differentiation, likely due to a reduction of  $\alpha$ -KG; whereas  
102 inhibiting GLS in *IDH1* or *IDH2* mutant chondrosarcoma led to a smaller tumor size and  
103 a reduction in cell viability, associated with the compromised production of non-essential  
104 amino acids. Collectively, these data highlight a previously unknown stage-dependent  
105 role of glutamine metabolism in cartilage tumors and may provide a therapeutic  
106 approach for the malignant cartilage tumor chondrosarcoma.

107

108 **Results:**

109 ***IDH1* or *IDH2* mutant chondrosarcomas cells exhibited increased glutamine**  
110 **contribution to anaplerosis and non-essential amino acids production.**

111 From a published dataset showing mRNA profiling ([E-MTAB-7264](#)) of chondrosarcoma  
112 tumors [40], we observed that expression of *GLS* was upregulated in chondrosarcomas  
113 with *IDH1* or *IDH2* mutations (Supplementary Fig 1), indicating glutamine metabolism  
114 might be important for cartilage tumor with *IDH1* or *IDH2* mutation. To understand how  
115 glutamine was utilized in chondrosarcoma cells, we performed carbon tracing  
116 experiment with  $^{13}\text{C}_5$ -glutamine in chondrosarcoma cells with wild type *IDH1* and *IDH2*,  
117 mutant *IDH1*, and mutant *IDH2*.  $^{13}\text{C}$  contribution to downstream metabolites was  
118 determined by measuring the isotope-labeling pattern. To be utilized by a cell, glutamine  
119 is first deaminated to glutamate through GLS. After that, glutamate can be converted to  
120  $\alpha$ -KG, a key metabolite in the tricarboxylic acid (TCA) cycle (Fig 1A). There was a  
121 significant amount of glutamate in chondrosarcomas of different genotypes labeled with  
122  $^{13}\text{C}$  (Fig 1B). Importantly, the labeling of  $^{13}\text{C}$  in glutamate was significantly higher in  
123 *IDH1* or *IDH2* mutant chondrosarcomas when compared to chondrosarcoma cells with  
124 wildtype *IDH1* and *IDH2* (Fig 1B). The  $^{13}\text{C}$  labeling pattern was examined in the TCA  
125 cycle intermediates and non-essential amino acids. Chondrosarcomas with *IDH1* or  
126 *IDH2* mutations had significantly higher carbon contribution to all TCA cycle  
127 intermediates (Fig 1C-1H) and some non-essential amino acids such as alanine (Fig 1I).

128 Thus, *IDH1* or *IDH2* mutant chondrosarcomas were more efficient than *IDH1* and *IDH2*  
129 wildtype chondrosarcomas in converting glutamine to its downstream metabolites.

130

131 **GLS was upregulated in IDH mutant chondrocytes.**

132 To understand the role of GLS in murine chondrocytes with *Idh1* mutation, we first  
133 examined whether expression of mutant *Idh1* gene could lead to altered GLS function.  
134 Expression of a mutant IDH1<sup>R132Q</sup> enzyme in chondrocytes was shown to be sufficient  
135 to initiate enchondroma-like lesion formation in mice [41]. Chondrocytes were isolated  
136 from mice expressing the conditional IDH1<sup>R132Q</sup> knock-in allele and transduced with  
137 adenovirus GFP or adenovirus Cre [42], GLS activity in these chondrocytes was  
138 determined by measuring the conversion from radio-active <sup>3</sup>H-glutamine to radio-active  
139 <sup>3</sup>H-glutamate. In primary chondrocytes expressing mutant IDH1<sup>R132Q</sup>, GLS activity was  
140 significantly upregulated by 2.5-fold (Fig 2A).

141

142 To investigate how chondrocytes with wildtype and mutant IDH1 enzymes utilize  
143 glutamine, we conducted <sup>13</sup>C tracing studies. In chondrocytes expressing the mutant  
144 *Idh1*, the percentage of <sup>13</sup>C labeling in glutamate (Fig 2C),  $\alpha$ -KG (Fig 2D), other TCA  
145 cycle intermediates (Fig 2E-2H), and the non-essential amino acid alanine (Fig 2I) was  
146 significantly increased.

147



148 Glutamine is a primary source for the production of D-2HG in IDH1 or IDH2 mutant  
149 cancers including chondrosarcoma [11, 32, 33]. To examine whether glutamine is also  
150 the primary source for D-2HG production in the murine chondrocytes expressing mutant  
151 *Idh1*, we cultured these chondrocytes with  $^{13}\text{C}_5$ -glutamine and examined the percentage  
152 of  $^{13}\text{C}$ -labeled D-2HG at different time points. After 10 hours, more than 80% of the D-  
153 2HG was labeled with  $^{13}\text{C}$ , confirming glutamine is the primary source for D-2HG in  
154 IDH1<sup>R132Q</sup> cells (Supplementary Fig 2). Thus, chondrocytes with an *Idh1* mutation  
155 showed increased GLS activity and more efficient conversion of glutamine to  
156 downstream metabolites, including D-2HG.

157

158 **GLS was important for chondrocyte differentiation and proliferation in**  
159 **chondrocytes with *Idh1* mutation.**

160 There are two isoforms of GLS, kidney-type GLS (encoded by *Gls*) and liver-type GLS  
161 (encoded by *Gls2*). There was very low level of expression of *Gls2* compared to *Gls* in  
162 primary chondrocytes of both *Col2a1Cre;Idh1<sup>LSL/+</sup>* and *Col2a1Cre* animals (Fig 3A,  
163 GSE123130), consistent with the notion that GLS activity in chondrocytes was mainly  
164 catalyzed by *Gls*. We thus focused on *Gls* in the murine chondrocytes. To examine the  
165 role of *Gls* in vivo, we conditionally deleted *Gls* in these cells by crossing mice carrying  
166 a conditional null allele of *Gls* (*Gls<sup>fl/fl</sup>*) to the *Col2a1Cre* deleter mouse which expresses  
167 Cre-recombinase in chondrocytes (Fig 3B, 3C) [43, 44]. *Col2a1Cre;Gls<sup>fl/fl</sup>* chondrocytes

168 had reduced glutamine uptake and glutamate production (Fig 3D), confirming the  
169 function of GLS was efficiently deleted in these mice.

170

171 We first examined the phenotype of murine tibias lacking *Gls* in chondrocytes with  
172 wildtype or mutant *Idh1* genes using H&E staining (Fig 3E). At embryonic E14.5,  
173 deleting *Gls* in *Idh1* wildtype chondrocytes did not cause a significant change in bone  
174 length (Fig 3E, 3F). Expression of a mutant *Idh1* gene in chondrocytes at this stage did  
175 not cause a reduction in bone length (Fig 3E, 3F). Deleting *Gls* in *Idh1* mutant  
176 chondrocytes significantly reduced the bone length (Fig 3E, 3F). At E16.5 and E18.5,  
177 we observed reduced bone length and defects in chondrocyte hypertrophic  
178 differentiation in *Idh1* mutant mice (Supplementary Fig 3A – 3F), consistent with our  
179 previous report [41]. Deleting *Gls* did not cause an obvious skeletal phenotype in *Idh1*-  
180 wildtype and *Idh1* mutant mice (Supplementary Fig 3A – 3F).

181

182 We then used in situ hybridization to examine markers important for chondrocyte  
183 differentiation. Early chondrocyte marker *Col2a1* and hypertrophic chondrocyte marker  
184 *Pth1r* were expressed by tibial chondrocytes at E14.5 (Fig 3G – 3J). However, the  
185 region between *Col2a1* expressing cells and *Pth1r* expressing cells were reduced in  
186 *Idh1* mutant animals. In *Gls;Idh1* double mutant mice, *Col2a1* expression cells and  
187 *Pth1r* expressing cells became single regions in the middle of the bone with no  
188 separation (Fig 3G-3J). *Col10a1* is expressed by hypertrophic chondrocytes. At E14.5,

189 expression pattern of *Col10a1* was comparable among control, *Gls* mutant, and *Idh*  
190 mutant mice, but in *Gls;Idh1* double mutant mice there was reduced zone of staining  
191 (Fig 3K – 3N). We also examined proliferation and apoptosis in these animals. No  
192 difference in proliferation was determined between control and *Gls* mutant animals in  
193 *Idh1* wildtype background, but there was an increase in proliferation when *Gls* was  
194 deleted in *Idh1* mutant mice (Fig 3O, 3P). Apoptosis was not detected in all animals at  
195 this stage based on immunohistochemistry of cleaved caspase 3 (Supplementary Fig  
196 3G).

197

### 198 **Deleting GLS in chondrocytes increased the number and size of enchondroma-** 199 **like lesions**

200 We next examined how deleting *Gls* in chondrocyte postnatally affected chondrocyte  
201 homeostasis in growth plates and enchondroma-like lesion formation in adult animals.  
202 We induced deletion of *Gls* at four weeks of age by tamoxifen and examined the  
203 phenotype at 6 months of age, a time point when growth plates were completely  
204 remodeled in control animals and enchondroma-like lesions were stable in *Idh1* mutant  
205 mice. Enchondroma-like lesions were identified in *Idh1* mutant animals as we previously  
206 reported and these animals showed less trabecular bone volume (Fig 4A - 4D). No  
207 obvious growth plate phenotype was observed in *Gls* mutant mice and histologic  
208 examination showed less trabecular bone (Fig 4A, 4B). In contrast, the number and  
209 size of enchondroma-like lesions were significantly increased when *Gls* was deleted in

210 *ldh1* mutant animals, and the trabecular bone volume was further reduced (Fig 4A –  
211 4D).

212

### 213 **GLS regulated chondrocyte differentiation through $\alpha$ -ketoglutarate**

214 Glutamine metabolism regulates chondrocyte differentiation through its downstream  
215 metabolites  $\alpha$ -KG in *ldh1* wildtype background [28]. We examined whether GLS could  
216 regulate the differentiation of chondrocytes containing a *ldh1* mutation through  $\alpha$ -KG.  
217 Our previous <sup>13</sup>C tracing experiments showed  $\alpha$ -KG was mainly derived from glutamine  
218 and *ldh1* mutant chondrocytes were more efficient in converting glutamine to  $\alpha$ -KG (Fig  
219 2D). We found the level of  $\alpha$ -KG was reduced by more than 70% in *ldh1* mutant  
220 chondrocytes (Fig 5A). Because chondrocytes with *ldh1* mutation were more efficient in  
221 converting glutamine to  $\alpha$ -KG, the lower intracellular concentration was likely because  
222  $\alpha$ -KG was converted to D-2HG. When GLS was inhibited in *ldh1* mutant chondrocytes  
223 by Bis-2-(5-phenylacetamido-1,3,4-thiadiazol-2-yl)ethyl sulfide (BPTES), a small  
224 molecular inhibitor for GLS [45],  $\alpha$ -KG level was further reduced by about 60% (Fig 5B).

225

226 Next, we investigated whether exogenous  $\alpha$ -KG could rescue the defects of  
227 chondrocyte differentiation in *Col2a1Cre;Gls<sup>fl/fl</sup>;ldh1<sup>LSL/+</sup>* animals. We injected cell  
228 permeable dimethyl- $\alpha$ -KG (DM- $\alpha$ -KG) to pregnant dams every day from E11.5 to E13.5  
229 and harvested the embryos at E14.5. Treatment with DM- $\alpha$ -KG rescued chondrocyte  
230 hypertrophy as *Col10a1* mRNA and COLX protein expression were both observed in

231 *Gls;Idh1*- double mutant mice (Fig 5C – 5E). Finally, DM- $\alpha$ -KG treatment led to a  
232 modest decrease in proliferation (Fig 5F, 5G) without inducing apoptosis (Fig 5H).

233

234 **Inhibiting GLS in *IDH1* or *IDH2* mutant chondrosarcoma xenografts reduced**

235 **tumor weight**

236 Previously it was reported that inhibiting GLS reduced viability in chondrosarcoma cell  
237 lines [36]. However, our murine data in enchondroma-like lesions suggests that GLS  
238 inhibition would have an opposite effect. We thus established patient-derived xenograft  
239 models as previously described to examine the effects of GLS inhibition in  
240 chondrosarcoma [46]. Chondrosarcoma tumors were divided into pieces at 5 mm x 5  
241 mm x 5 mm and implanted to immune-deficient Nod-scid-gamma mice subcutaneously.  
242 We treated these animals with BPTES or vehicle control for 14 days and measured the  
243 tumor weight at the time of sacrifice. For each patient sample, the tumor weight of each  
244 mouse was normalized to the average tumor weight in the vehicle control group of the  
245 same patient sample. BPTES treatment significantly reduced tumor weight of  
246 chondrosarcoma tumors with *IDH1* mutations (Fig 6B, 6C). We examined proliferation  
247 and apoptosis in these tumors using immunohistochemistry of Ki67 and cleaved  
248 caspase 3 respectively. BPTES treatment significantly increased apoptosis in  
249 chondrosarcoma xenografts but we did not observe a substantial difference in  
250 proliferation (Fig 6D-6G). We then examined chondrosarcoma cells treated with BEPTS  
251 in vitro. Consistent with our findings in vivo, BPTES treatment reduced cell viability,

252 increased cell apoptosis, and did not alter proliferation in *IDH1* or *IDH2* mutant  
253 chondrosarcomas (Fig 6H-6J). Interestingly, BPTES treatment did not alter tumor  
254 burden of *IDH1* and *IDH2* wildtype chondrosarcoma (Supplementary Fig 4). These data  
255 support previously published studies and show a different role of GLS in human  
256 chondrosarcoma than murine enchondroma-like lesions.

257

### 258 **GLS inhibited the production of non-essential amino acids in chondrosarcoma**

259

260 We next sought to understand how glutamine metabolism regulated cell survival of  
261 *IDH1* or *IDH2* mutant chondrosarcomas. Similar to in the mouse,  $\alpha$ -KG levels were  
262 lower with BPTES treatment (Fig 7A), However, unlike our murine findings, adding DM-  
263  $\alpha$ -KG did not rescue the apoptosis changes seen with BEPTS treatment (Fig 7B).

264

265 Downstream of GLS, glutamate could be further metabolized to  $\alpha$ -KG through glutamate  
266 dehydrogenase and transaminases. Inhibiting transaminases by aminooxyacetate  
267 (AOA) caused a reduction of cell viability in *IDH1* or *IDH2* mutant chondrosarcomas  
268 similar to the effects of BPTES, but inhibiting glutamate dehydrogenase by  
269 epigallocatechin gallate (EGCG) did not affect cell survival (Fig 7C). These data  
270 suggested transaminases might be more critical for chondrosarcoma cell survival  
271 downstream of GLS.

272

273 Non-essential amino acids can be produced from glutamine through GLS and then  
274 transaminases. They are known to play role in regulating cancer apoptosis, raising the  
275 possibility that they are playing this role in chondrosarcoma. We found lower levels of  
276 multiple non-essential amino acids when GLS was inhibited by BPTES (Fig 7D). We  
277 treated these chondrosarcoma cells with non-essential amino acids, and in contrast to  
278 our data from DM- $\alpha$ -KG, we found a modest rescue of apoptosis changes (Fig 7E).  
279 However, supplementing non-essential amino acids to *Col2a1Cre;Gls<sup>fl/fl</sup>;Idh1<sup>LSL/+</sup>*  
280 metatarsal organ culture did not lead to rescue of chondrocyte differentiation defects  
281 (Supplementary Fig 5), suggesting they might not be the key mediator of the murine  
282 enchondroma-like lesions.

283

#### 284 **Discussion:**

285 In this study, we found that glutamine contribution to downstream metabolites was  
286 upregulated in chondrosarcomas and chondrocytes with mutations in IDH1 or IDH2  
287 enzymes. Glutamine metabolism played different roles in the benign tumor  
288 enchondroma and the malignant cancer chondrosarcoma. Deleting GLS in murine  
289 chondrocytes with *Idh1* mutation interrupted hypertrophic differentiation during  
290 embryonic development and led to increased number and size of enchondroma-like  
291 lesions in adult animals. In malignant *IDH1* or *IDH2* mutant chondrosarcomas isolated  
292 from human patients, pharmacological inhibition of GLS led to reduced tumor weight.

293

294 Enchondroma arises from dysregulated chondrocyte differentiation. In our mouse data,  
295 we observed that chondrocytes with an *ldh1* mutation had significantly lower  $\alpha$ -KG  
296 levels and blocking GLS further decreased  $\alpha$ -KG concentration. It is possible that  
297 glutamine metabolism regulates chondrocyte differentiation and the enchondroma-like  
298 phenotype of *ldh1* mutant animals through its downstream metabolites  $\alpha$ -KG. Glutamine  
299 metabolism is known to regulate cell proliferation and differentiation in the skeletal  
300 system. Stegen et al. reported *Gls* regulated chondrocyte differentiation through  $\alpha$ -KG  
301 and its downstream metabolite acetyl-CoA postnatally via epigenetic regulation [28]. Yu  
302 et al. showed deleting *Gls* in skeletal stem cells led to increased adipogenic  
303 differentiation and compromised osteogenic differentiation as well as reduced cell  
304 proliferation [27]. Our finding is consistent with these studies and further support the  
305 notion that *Gls* could regulate cell differentiation and proliferation through  $\alpha$ -KG in the  
306 skeletal system. The mechanism through which  $\alpha$ -KG regulate chondrocyte  
307 differentiation remains to be determined. It possible that  $\alpha$ -KG could affect expression of  
308 chondrogenic genes through altering histone modifications and DNA methylation.

309

310 Different from our data in mouse enchondroma-like lesions, inhibiting GLS in human  
311 *IDH1* or *IDH2* mutant chondrosarcomas led to reduced tumor weight. Supplementing  
312 non-essential amino acids to BPTES treated *IDH1* or *IDH2* mutant chondrosarcomas  
313 partially rescued apoptosis, suggesting these cancer cells relied on glutamine  
314 metabolism for the production of non-essential amino acids to prevent cell death. In



315 multiple different cancer cell lines, glutamine supported cancer cell proliferation and  
316 suppressed apoptosis and autophagy through producing other non-essential amino  
317 acids [47-51]. Non-essential amino acids mixture provides seven non-essential amino  
318 acids alanine, asparagine, aspartate, glycine, serine, proline, and glutamate. Many of  
319 them have been shown to be critical for cancer cell viability, especially under metabolic  
320 stress. In glioblastoma and neuroblastoma, glutamine deprivation induced apoptosis,  
321 which could be restored by exogenous asparagine [51]. In pancreatic cancer, aspartate  
322 becomes “essential” when glutamine availability or metabolism is limited [52]. Glutamine  
323 could also regulate cancer cell viability through sustaining cellular redox homeostasis  
324 [26]. For the next step, it will be important to understand which and how non-essential  
325 amino acid(s) prevent apoptosis in *IDH1* or *IDH2* mutant chondrosarcomas.

326

327 The distinct roles of glutamine metabolism in enchondroma and chondrosarcoma were  
328 possibly due to different metabolic needs at different stages of tumor development. As  
329 enchondroma rises from dysregulated chondrocyte differentiation,  $\alpha$ -KG – the regulator  
330 for cell differentiation plays an important role in the development of the benign tumor.  
331 For malignant chondrosarcomas, changes in differentiation might not be critical for  
332 tumor growth. However, these *IDH1* or *IDH2* mutant cancer cells might require some  
333 amino acids to support anaplerosis or synthesize glutathione in order to cope with  
334 oxidative stress.

335

336 One limitation of this study is that we studied the role of glutamine metabolism in  
337 enchondromas and chondrosarcomas using mouse models and human patient samples  
338 respectively. Thus, it is possible the distinct roles of glutamine metabolism we observed  
339 was caused by different metabolic needs of murine and human cells. To address this  
340 concern, it will be important to establish mouse models to study chondrosarcoma and to  
341 determine the role of glutamine metabolism in human enchondroma samples.

342

343 In summary, our study showed that GLS-mediated glutamine metabolism played distinct  
344 roles in *IDH1* or *IDH2* mutant enchondromas and chondrosarcomas although it was  
345 upregulated in both conditions. In the context of enchondroma, deleting GLS in  
346 chondrocytes with *Idh1* mutation increased the number and size of enchondroma-like  
347 lesions. In chondrosarcoma, inhibiting GLS led to decreased tumor weight. Glutamine  
348 regulated the proliferation and apoptosis in these tumors differently through different  
349 downstream metabolites. Glutamine-derived  $\alpha$ -ketoglutarate is a key regulator of  
350 chondrocyte differentiation. Deleting GLS in chondrocytes with *Idh1* mutation impaired  
351 hypertrophic differentiation and increased cell proliferation, which may lead to increased  
352 number and size of enchondroma-like lesions. In chondrosarcoma, GLS regulated cell  
353 apoptosis partially through producing non-essential amino acids. Inhibiting GLS reduced  
354 cell viability and increased cell apoptosis. Supplementation of non-essential amino acids  
355 partially rescued such effects.

356

357 **Methods:**

358 **Animals:**

359 *Idh1<sup>LSL/+</sup>*, *Gls<sup>fl/fl</sup>* (JAX: #017894), *Col2a1Cre*, *Col2a1Cre<sup>ERT2</sup>*, and NOD *scid gamma*  
360 (NSG) mice are as previously described [27, 41, 43, 44, 53, 54]. Congenic animals were  
361 used in every experiment. *Idh1<sup>LSL/+</sup>* mice bear a conditional knock-in of the point  
362 mutation IDH1-R132Q as previous clarified [41].

363

364 **Isolation of primary chondrocytes:**

365 Primary sternal chondrocytes isolation was as described before [55]. In brief, mouse  
366 sterna and ribs from P3 neonates were cleaned and digested by pronase (Roche,  
367 11459643001) at 2 mg/ml PBS at 37°C with constant agitation for 1 hour, Collagenase  
368 IV (Worthington, LS004189) at 3 mg/ml DMEM at 37°C for 1 hour, Collagenase IV at 0.5  
369 mg/ml DMEM at 37°C for 3 hours, and filtered using 45 µm cell strainer.

370

371 **Cell Culture:**

372 Chondrocytes were cultured in high-glucose DMEM with 10% FBS and 1% penicillin /  
373 streptomycin. Primary chondrosarcoma cells were cultured in  $\alpha$ -MEM with 10% FBS  
374 and 1% penicillin / streptomycin. In some experiments, chondrocytes and  
375 chondrosarcoma cells were treated with 10µM Bis-2-(5-phenylacetamido-1,2,4-  
376 thiadiazol-2-yl)ethyl sulfide (BPTES), 100µM epigallocatechin gallate (EGCG), 500µM

377 aminoxyacetate (AOA), 2X non-essential amino acids, or DMSO at indicated for  
378 indicated 48 hours. Cells were cultured at 37°C humidified 5% CO<sub>2</sub> incubator.

379

380 **Transfection:**

381 In indicated experiment, chondrocytes were transfected with adenovirus-GFP and  
382 adenovirus-Cre at 400 MOI.

383

384 **Metatarsal Organ Culture:**

385 The 2<sup>nd</sup>, 3<sup>rd</sup>, and 4<sup>th</sup> metatarsal bones were dissected from the hindlimbs of embryos at  
386 E16.5. They were transferred to 24-well non-adherent plate with 1mL  $\alpha$ -MEM  
387 supplemented with 50 $\mu$ g/ml ascorbic acid, 1mM  $\beta$ -glycerophosphate, and 0.2% bovine  
388 serum albumin. The media was changed every other day. Explants were cultured at  
389 37°C humidified 5% CO<sub>2</sub> incubator for five days and then fixed with 10% neutral  
390 buffered formalin (NBF).

391

392 **EdU assay:**

393 EdU assay (ThermoFisher C10337) was performed according to manufacturer's  
394 instructions. In brief, cells were cultured with 10 mM EdU for 12 hours prior to fixation  
395 with 4% PFA / PBS for 15 min and permeabilization with 0.5% Triton™ X-100 for 20 min  
396 at room temperature. Cells were then incubated with Click-iT® reaction cocktail for 30  
397 min in dark at room temperature and stained with DAPI.

398

399 **TUNEL assay:**

400 TUNEL assay was performed according to manufacturer's instructions (Roche,  
401 11684795910). In brief, cells were fixed with 4% PFA / PBS at room temperature for 1  
402 hr and permeabilized with 0.1% Triton™ X-100 in 0.1% sodium citrate for 2 min on ice.  
403 After rinse with PBS, cells were incubated with TUNEL reaction mixture at 37°C for 1 hr  
404 and stained with DAPI.

405

406 **Cell Viability Assay:**

407 Cell viability was determined by CellTiter-Glo® Assay according to manufacturer's  
408 instructions (Promega G7570). In brief, CellTiter-Glo® Buffer was thawed at room  
409 temperature and transferred to CellTiter-Glo® Substrate. Cell culture plate was  
410 equilibrated to room temperature for 30min. 100 µL of CellTiter-Glo® Reagent was  
411 added to the cell culture media in each well. The plate was mixed for 2 min on an orbital  
412 shaker and incubated for 10 minutes at room temperature. Luminescence was then  
413 recorded. Cell viability of each primary chondrosarcoma patient sample was normalized  
414 to the average cell viability in the vehicle group of the same sample.

415

416 **Annexin V / PI staining:**

417 Annexin V and Propidium Iodide staining was performed according to manufacturer's  
418 instructions (Invitrogen™ R37176, Invitrogen™ P1304MP). In brief, 1 drop of Annexin V

419 APC Ready Flow Conjugate was added to 0.5 mL of annexin-binding buffer with 2.5 mM  
420 calcium. 1mg/mL PI was added to the APC binding buffer with 1/1000 dilution. The cells  
421 were incubated for 15 minutes at room temperature. Fluorescence was detected by flow  
422 cytometry.

423

424 **GLS activity assay:**

425 Primary chondrocytes were cultured to prior to experiment. After washing cells with  
426 Hanks Buffered Saline Solution (HBSS) for three times, cells were cultured in  $\alpha$ -MEM  
427 containing media containing 2 $\mu$ M Glutamine and 4 mCi/mL L-[3,4-<sup>3</sup>H(N)]-Glutamine  
428 (PerkinElmer, NET551250UC). GLS activity was terminated by washing cells with ice  
429 cold HBSS for three times followed by scraping cells with 1 mL ice cold milliQ water.  
430 Cells were lysed by sonication for 1 min with 1 sec pulse at 20% amplitude. Cell lysates  
431 were bound onto AG 1-X8 polyrep anion exchange column. Uncharged glutamine was  
432 eluted with 2 mL of milliQ water for three times. Negatively charged glutamate and  
433 downstream metabolites were eluted with 2 mL of 0.1M HCl for three times. After  
434 adding 4 mL of scintillation cocktail to the eluent, DPM of the solution was measured by  
435 a Beckman LS6500 Scintillation counter.

436

437 **Xenograft:**

438 Prior to the experiment, chondrosarcoma cells from each patient's tumor were  
439 maintained subcutaneously in vivo in NSG mice. For the xenograft experiment, tumors

440 were surgically removed from each mouse and divided into explants of 5 x 5 x 5 mm  
441 each, and implanted into the subcutaneous tissue on the back of NSG mice. BPTES  
442 and vehicle control (10% DMSO / PBS) treatment started 10 days after implantation.  
443 Mice were treated with BPTES at 0.2 g / kg or vehicle via intraperitoneal injection daily  
444 for 14 days. Tumor weights were recorded upon harvest. For each patient-derived  
445 xenograft experiment, relative tumor weight was determined by normalizing the tumor  
446 weight of each tumor to the average tumor weight of the vehicle control group.

447

#### 448 **Histological analysis:**

449 Bone histomorphometry for adult mice was performed on hindlimbs fixed in 10% neutral  
450 buffered formalin for 3 days followed by decalcification with 14% EDTA for 2 weeks at  
451 room temperature. Histomorphometry for embryonic skeletons was performed on tibias  
452 fixed in 10% neutral buffered formalin overnight followed by decalcification with 14%  
453 EDTA overnight at room temperature. Following decalcification, skeletons were  
454 embedded in paraffin and sectioned at 5  $\mu$ m thickness. Safranin O staining was  
455 performed following standard protocol.

456

#### 457 **Immunohistochemistry:**

458 Immunohistochemistry was performed on 5  $\mu$ m paraffin-sectioned limbs. For type X  
459 collagen, antigen retrieval was performed by citrate buffer incubation at 85°C for 15min  
460 and hyaluronidase digestion at 10 mg/ml at 37°C for 30 min. For BrdU staining, BrdU

461 labeling reagent (Invitrogen, 000103) was injected to pregnant female mice at 1 mL /  
462 100 g body weight 2 hours prior to euthanasia. Antigen retrieval was performed by  
463 proteinase K digestion at 10 µg/ml at room temperature for 10 min. For MMP13, antigen  
464 retrieval was performed by hyaluronidase digestion at 5 mg/ml at 37°C for 30 min. For  
465 all immunohistochemistry, endogenous peroxidase activity was blocked by incubation  
466 with 3% H<sub>2</sub>O<sub>2</sub> / Methanol for 10 minutes followed by incubation with Dako Dual  
467 Endogenous Enzyme Block reagent (Agilent Dako, S2003) for 30 min at room  
468 temperature. The specimen was blocked with 2% horse serum at room temperature for  
469 30 min followed by incubation with antibodies for Col X (1:500, ThermoFisher, 14-9771-  
470 82), BrdU (1:1000, ThermoFisher, MA3-071), MMP13 (1:100, MilliporeSigma  
471 MAB13424) overnight at 4°C. TUNEL assay was performed according to manufacturer's  
472 instructions (Roche, 11684795910). In brief, the tissue was incubated with proteinase K  
473 at 10 µg/ml at room temperature for 20 min, and then in TUNEL labeling reagent 37°C  
474 for 1 hour. Quantification of the length of hypertrophic zone and bone elements was  
475 done using the image processing software Fiji Image J.

476

#### 477 **In situ hybridization:**

478 In situ hybridization was performed on 5 µm paraffin-sectioned limbs. Paraffin sections  
479 were deparaffinized and rehydrated, followed by fixation with 4% PFA at room  
480 temperature for 15 minutes. Sections were then treated with 20 µg/ml proteinase K for  
481 15 minutes at room temperature, fixed with 4% PFA at room temperature for 10



482 minutes, and acetylated with for 10 minutes. Sections were then incubated with  
483 hybridization buffer at 58°C for 3 hours, and then incubated with Digoxigenin-labeled  
484 RNA probe (*Col2a1*, *Pth1r*, *Co10a1*) at 58°C overnight. Sections were then washed with  
485 5x SSC for one time at 65°C, followed by RNase A treatment at 37°C for 30 minutes.  
486 Sections were then washed 2x SSC for one times, 0.2x SSC for two times at 65°C, and  
487 then blocked with 2% Boehringer Blocking Reagent / 20% Heat Inactivated Sheep  
488 Serum for one hour. Sections were then blocked with Anti-Digoxigenin antibody (1:4000  
489 in blocking solution) at 4°C overnight. Sections were developed with BM Purple at room  
490 temperature until color developed.

491

#### 492 **Analysis of enchondroma-like lesions and trabecular bone volume:**

493 Tamoxifen was administered daily for 10 days at 100 mg / kg body weight / day via  
494 intraperitoneal injection starting at 4 weeks of age. Mice were euthanized at 6-month of  
495 age. Hindlimbs were harvested for analyzing growth-plate and enchondroma-like  
496 phenotype. Hip-joint cartilage was used for confirming DNA recombination.  
497 Quantification of enchondroma-like lesions was performed as previously described [55].  
498 In brief, enchondroma-like lesions were first identified by Safranin-O staining, which was  
499 performed on one slide (2 sections, 5 µm / section) in every ten consecutive slides (10  
500 µm). We then examined every slide consecutively under the light microscope to identify  
501 lesions that did not span to the Safranin O stained slide. The number of lesions were  
502 then recorded. For every Safranin O stained slide, we manually outlined each lesion

503 and measured the area of each lesion using the image processing software Fiji Image J.  
504 We estimated the lesion size of each animal by adding up the areas of all the lesions in  
505 that animal. The lesion size for each animal was normalized to the average lesion size  
506 of *Col2Cre<sup>ERT2</sup>;Idh1<sup>LSL/+</sup>* animals. Quantification of trabecular bone volume was  
507 performed by adding up the trabecular bone surface of each Safranin O-stained slide.  
508 For every Safranin O stained slide, we manually outlined the trabecular bone 1200  $\mu$ m  
509 below the growth plates of each tibia and femur and measured the area of trabecular  
510 bones using the image processing software Fiji Image J. We estimated the lesion size  
511 of each animal by adding up the areas of all the trabecular bones in our region of  
512 interest in that animal.

513

#### 514 **Xenograft:**

515 Prior to the experiment, chondrosarcoma cells from each patient's tumor were  
516 maintained subcutaneously in vivo in NSG mice. For the xenograft experiment, tumors  
517 were surgically removed from each mouse and divided into explants of 5 x 5 x 5 mm  
518 each, and implanted into the subcutaneous tissue on the pack of NSG mice. BPTES  
519 and vehicle control treatment started 10 days after implantation. Mice were treated with  
520 BPTES at 0.2 g / kg or vehicle control via intraperitoneal injection daily for 14 days.  
521 Tumor weights were recorded upon harvest. For each patient-derived xenograft  
522 experiment, relative tumor weight was determined by normalizing the tumor weight of  
523 each tumor to the average tumor weight of the vehicle control group.

524

525 **D-2HG measurement:**

526 D-2HG is analyzed by liquid chromatography – tandem mass spectrometry  
527 (LC/MS/MS). Cell culture media was collected from each sample. After adding 2-HG-<sup>2</sup>H<sub>4</sub>  
528 (internal standard), the sample was dried under nitrogen and derivatized by (+)-O,O'-  
529 diacetyl-L-tartaric anhydride (DATAN) for measurement.

530

531 **Carbon Isotope Labeling**

532 Chondrocytes were cultured in DMEM with 4500mg/L Glucose and 4mM <sup>15</sup>C<sub>5</sub>-  
533 Glutamine in 6cm cell culture plates for specified time. 500μL methanol was used to  
534 extract metabolites from each plate. After centrifuge at 12000rpm for 15min,  
535 supernatant was dried at 37°C. The dried residues were resuspended in 25 μL of  
536 methoxylamine hydrochloride (2% (w/v) in pyridine) and incubated at 40°C for 1.5 hours  
537 in a heating block. After brief centrifugation, 35 μL of MTBSTFA + 1% TBDMS was  
538 added, and the samples were incubated at 60°C for 30 minutes. The derivatized  
539 samples were centrifuged for 5 minutes at 20,000 x g, and the supernatants were  
540 transferred to GC vials for GC-MS analysis. A modified GC-MS method was employed  
541 <sup>23</sup>. The injection volume was 1 μL, and samples were injected in splitless mode. GC  
542 oven temperature was held at 80°C for two minutes, increased to 280°C at 7°C/min, and  
543 held at 280°C for a total run time of forty minutes. GC-MS analysis was performed on an  
544 Agilent 7890B GC system equipped with a HP-5MS capillary column (30 m, 0.25 mm

545 i.d., 0.25  $\mu\text{m}$ -phase thickness; Agilent J&W Scientific, Santa Clara, CA), connected to  
546 an Agilent 5977A Mass Spectrometer operating under ionization by electron impact (EI)  
547 at 70 eV. Helium flow was maintained at 1 mL/min. The source temperature was  
548 maintained at 230°C, the MS quad temperature at 150°C, the interface temperature at  
549 280°C, and the inlet temperature at 250°C. Mass spectra were recorded in mass scan  
550 mode with  $m/z$  from 50 to 700.

551  
552  **$^{13}\text{C}$ -based Stable Isotope Analysis**  
553  $M_0, M_1, \dots, M_n$  refers to the isotopologues containing  $n$  heavy atoms in a molecule. The  
554 stable isotope distribution of individual metabolites was measured by GC-MS as  
555 described above. The isotopologue enrichment or labeling in this work refers to the  
556 corrected isotope distribution <sup>24,25</sup>.

557  
558 **Gene expression of *G/s* from chondrosarcoma patient samples:**

559 We used retrospective data from RESOS INCA network of bone, collected from 102  
560 cartilage tumors in different French hospitals. Multiple samples may be taken from each  
561 tumor and sequenced. More details about the experiment, such as RNA isolation  
562 method and profiling, can be found the original paper [40]. For our purposes, we utilized  
563 IDH mutation information to categorize samples into two groups: *IDH1* or *IDH2* mutation  
564 ( $n=46$ ) and *IDH1* and *IDH2* wild type ( $n=98$ ). We examined several gene expression  
565 levels across these two groups and reported adjusted p-value for GLS result (with

566 Benjamini–Hochberg correction). All the data processing and calculation was performed  
567 using Bioconductor docker (devel), with R version 4.0.3 and Bioconductor version 3.13.

568

569 **Quantification and Statistical Analysis:**

570 Statistical analyses were performed using Graphpad Prism 9 software. Data were  
571 presented as mean±SEM, mean±SD, or mean±95% as specified in each figure.

572 Statistical significance was determined by two tailed student-t test or one-way or two-  
573 way ANOVA with multiple comparisons test as specified in each figure.

574

575 **Acknowledgement**

576 Research reported in this publication was supported by the National Institute of Arthritis  
577 and Musculoskeletal and Skin Diseases of the National Institutes of Health under award  
578 R01AR066765. The content is solely the responsibility of the authors and does not  
579 necessarily represent the official views of the National Institutes of Health.

580

581 **Conflict of Interests**

582 The authors declare no conflicts of interests.

583

584 **Figure Legends**

585

586 Fig 1: Chondrosarcomas with *IDH1* or *IDH2* mutations had significantly increased  
587 contribution from glutamine carbon to downstream metabolites. (A) Graphical depiction  
588 of tracing glutamine metabolism using  $^{13}\text{C}_5$ -glutamine. Filled circles indicate  $^{13}\text{C}$  and  
589 open circles indicate  $^{12}\text{C}$ . Green dashed line with arrowhead indicates the direction of  
590 oxidative decarboxylation. Blue dashed line with arrowhead indicates the direction of  
591 reductive carboxylation. (B-I) Percentage of  $^{13}\text{C}_5$ -glutamine contribution to glutamate  
592 (B),  $\alpha$ -ketoglutarate (C), succinate (D), fumarate (E), malate (F), oxaloacetate /  
593 aspartate (G), citrate (H), and alanine (I). mean $\pm$ SD are shown. \*\*\*\*p<0.0001 (ANOVA).

594

595 Fig 2: Chondrocytes with *Idh1* mutation had increased GLS activity and glutamine  
596 contribution to downstream metabolites. (A) GLS activity of AdGFP;*Idh1*<sup>LSL/+</sup> and  
597 AdCre;*Idh1*<sup>LSL/+</sup> chondrocytes. (B) Graphical depiction of tracing glutamine metabolism  
598 using  $^{13}\text{C}_5$ -glutamine. Filled circles indicate  $^{13}\text{C}$  and open circles indicate  $^{12}\text{C}$ . Green  
599 dashed line with arrowhead indicates the direction of oxidative decarboxylation. Blue  
600 dashed line with arrowhead indicates the direction of reductive carboxylation. (C-I)  
601 Percentage of  $^{13}\text{C}_5$ -glutamine contribution to glutamate (C),  $\alpha$ -ketoglutarate (D),  
602 fumarate (E), malate (F), oxaloacetate / aspartate (G), citrate (H), and alanine (I). M0,  
603 M1, ..., Mn refers to the isotopologues containing n heavy atoms in a molecule. For (A),

604 mean±95% CI is shown, \*\*p<0.01 (unpaired student t-test). For (C-I), mean±SD are  
605 shown. \*\*p<0.01, \*\*\*\*p<0.0001 (ANOVA).

606

607 Figure 3: Deleting GLS in *Col2a1Cre;ldh1<sup>LSL/+</sup>* chondrocytes affected chondrocyte  
608 differentiation. (A) Expression of *Gls* and *Gls2* in chondrocytes of *Col2a1Cre* and  
609 *Col2a1Cre;ldh1<sup>LSL/+</sup>* animals. (B) Expression of *Gls* in chondrocytes of *Gls<sup>fl/fl</sup>* and  
610 *Col2a1Cre;Gls<sup>fl/fl</sup>* animals.(C) Western blot of GLS and  $\beta$ -actin in chondrocytes of *Gls<sup>fl/fl</sup>*  
611 and *Col2a1Cre;Gls<sup>fl/fl</sup>* animals. (D) <sup>3</sup>H-glutamate production (i) and <sup>3</sup>H-glutamine uptake  
612 (ii) in chondrocytes of *Gls<sup>fl/fl</sup>* and *Col2a1Cre;Gls<sup>fl/fl</sup>* animals. (E) H&E staining. (F)  
613 Quantification of the length of tibias. (G) In situ hybridization of *Col2a1*. (H)  
614 Quantification of the length of *Col2a1* negative zone. (I) In situ hybridization of *Pth1r*. (J)  
615 Quantification of the length of *Pth1r* negative zone. (K) In situ hybridization of *Col10a1*.  
616 (L) Quantification of the length of *Col10a1* positive zone. (M) Immunohistochemistry of  
617 Col X. (N) Quantification of the length of Col X positive area. (O) Immunohistochemistry  
618 of BrdU. (P) Quantification of percentage of BrdU positive cells. For (A), (B), (D), (P),  
619 mean±95% CI are shown. \*\*p<0.01, \*\*\*\*p<0.0001 (unpaired student t-test). For (F), (H),  
620 (J), (L), (N) mean±SEM are shown. \*p<0.05, \*\*p<0.01, \*\*\*p<0.001, \*\*\*\*p<0.0001  
621 (ANOVA). Scale bar = 100  $\mu$ m.

622

623 Fig 4: Deleting *Gls* in *Col2a1Cre<sup>ERT2</sup>;ldh1<sup>LSL/+</sup>* chondrocytes increased the number and  
624 size of enchondroma-like lesions. (A) Representative Safranin O staining of mice of



625 specified genotypes. Enchondroma-like lesions are highlighted in yellow circles. (B)  
626 Quantification of the volume of trabecular bone based on Safranin O staining. (C-D)  
627 Quantification of the number (B) and size (C) of enchondroma-like lesions in animals of  
628 specified genotypes. mean $\pm$ 95% CI are shown, For (B), mean $\pm$ SEM are shown.  
629 \*p<0.05, \*\*\*\*p<0.0001 (ANOVA). For (C) and (D), \*p<0.05 (unpaired student t-test).  
630 Scale bar = 100  $\mu$ m.

631  
632 Fig 5: GLS regulated *Col2a1Cre;ldh1<sup>LSL/+</sup>* chondrocyte differentiation through  
633 downstream metabolite  $\alpha$ -KG. (A) Relative intracellular  $\alpha$ -KG concentration in  
634 AdGFP;*ldh1<sup>LSL/+</sup>* and AdCre;*ldh1<sup>LSL/+</sup>* chondrocytes. (B) Relative intracellular  $\alpha$ -KG  
635 concentration in AdCre;*ldh1<sup>LSL/+</sup>* chondrocytes treated with vehicle control or 10  $\mu$ M  
636 BPTES. (B) Immunohistochemistry of Col X of metatarsal bones in organ culture. (C) In  
637 situ hybridization of *Col10a1*. (D) Immunohistochemistry of Col X. (E) Quantification of  
638 the length of Col X positive zone. (F) Immunohistochemistry of BrdU. (G) Quantification  
639 of the percentage of BrdU positive cells. (H) Immunohistochemistry of cleaved caspase  
640 3. For (A), (B), mean $\pm$ 95% CI are shown. \*p<0.05 (unpaired student t-test). For (E), (G),  
641 mean $\pm$ SEM are shown. \*p<0.05, \*\*p<0.01(ANOVA). Scale bar = 100  $\mu$ m.

642  
643 Fig 6: Inhibiting GLS reduced tumor weight and induced apoptosis in chondrosarcomas  
644 with *IDH* mutations. (A) Experimental design for the xenograft experiment. (B)  
645 Representative pictures of xenografted tumor at the time of harvest. (C) Relative tumor

646 weight of xenografted chondrosarcoma tumors at the time of harvest. (D)  
647 Representative picture of immunohistochemistry of Ki67 of xenografted tumors. (E)  
648 Quantification of relative proliferation rate of each tumor determined by percentage of  
649 Ki67 positive cells. (F) Representative picture of immunohistochemistry of cleaved  
650 caspase 3 of xenografted tumors. (G) Relative apoptotic rate of each tumor determined  
651 by percentage of cleaved caspase 3 positive cells. (H) Relative cell viability of  $IDH1/2^{Mut}$   
652 chondrosarcoma cells treated with 10 $\mu$ M BPTES determined by CellTiter Glo cell  
653 viability assay. (I) Relative proliferation rate of *IDH1* or *IDH2* mutant chondrosarcoma  
654 cells treated with 10 $\mu$ M BPTES in vitro determined by EdU staining. (J) Relative  
655 apoptosis of *IDH1* or *IDH2* mutant chondrosarcoma cells treated with 10 $\mu$ M BPTES in  
656 vitro determined by TUNEL staining. For 6H-6J, Each dot represents one patient  
657 sample. mean $\pm$ 95% CI are shown. \*\*p<0.01. \*\*\*\*p<0.0001 (unpaired student t-test).

658  
659 Fig 7: GLS regulated cell apoptosis of chondrosarcomas with *IDH1* or *IDH2* mutations  
660 through production of non-essential amino acids. (A) Relative concentration of  $\alpha$ -KG in  
661 *IDH1* or *IDH2* mutant chondrosarcomas treated with 10 $\mu$ M BPTES. (B) Relative  
662 apoptosis of *IDH1* or *IDH2* mutant chondrosarcoma cells treated 10 $\mu$ M BPTES, or  
663 10 $\mu$ M BPTES+1mM DM- $\alpha$ -ketoglutarate determined by Annexin V staining. (C) Relative  
664 cell viability of  $IDH1/2^{Mut}$  chondrosarcoma cells treated with 100 $\mu$ M AOA and and  
665 500 $\mu$ M EGCG. Each dot represents one patient sample. (D) Relative concentration of  
666 different amino acids in *IDH1* or *IDH2* mutant chondrosarcomas treated with 10 $\mu$ M

667 BPTES. (E) Relative apoptosis of *IDH1* or *IDH2* mutant chondrosarcoma cells treated  
668 10 $\mu$ M BPTES, or 10 $\mu$ M BPTES+2X NEAA determined by Annexin V staining. For 7(B)  
669 and 7(E), each dot represents one patient sample. Relative metabolite concentration  
670 (7A, 7D), apoptosis (7B, 7E), and cell viability (7C) were determined by normalizing the  
671 value of each treatment group to the value of the vehicle control in each experiment. For  
672 (A), (C), and (D), mean $\pm$ 95% CI are shown. For (B) and (E), \*\* $p$ <0.01 (paired student t-  
673 test).

674

675 Supplementary Fig 1: *GLS* was upregulated in chondrosarcoma tumors with *IDH1* or 2  
676 mutations. Relative gene expression of *GLS* in human chondrosarcoma patient samples  
677 with wildtype or mutant *IDH1* or *IDH2*. mean $\pm$ 95% CI are shown. \*\* $p$ adj<0.05.

678

679 Supplementary Fig 2: Glutamine was the primary source for D-2HG production in  
680 chondrocytes with *Idh1* mutation. (A) Graphical depiction of tracing glutamine  
681 metabolism using <sup>5</sup>C<sub>5</sub>-glutamine. Filled circles indicate <sup>13</sup>C and open circles indicate  
682 <sup>12</sup>C. (B) AdCre;*Idh1*<sup>LSL/+</sup> chondrocytes used glutamine for D-2HG production.  
683 Percentage of <sup>13</sup>C labeling in D-2HG at different time points.

684

685 Supplementary Fig 3: *Col2a1Cre;Idh1*<sup>LSL/+</sup> and *Col2a1Cre;Gls*<sup>fl/fl</sup>;*Idh1*<sup>LSL/+</sup> animals  
686 displayed defects in bone growth and hypertrophic chondrocyte differentiation. (A) H&E  
687 staining of murine tibias at E16.5. (B) Quantification of tibia length based on H&E

688 staining at E16.5. (C) Immunohistochemistry of Col X of murine tibias at E16.5. (D) H&E  
689 staining of murine tibias at E18.5. (E) Quantification of tibia length based on H&E  
690 staining at E18.5. (F) Immunohistochemistry of Col X of murine tibias at E18.5. (G)  
691 Immunohistochemistry of cleaved caspase 3 of murine tibias at E14.5. mean±SEM are  
692 shown. \*\*p<0.01, \*\*\*p<0.001, \*\*\*\*p<0.0001 (ANOVA)

693

694 Supplementary Fig 4: BPTES treatment did not cause significant change in tumor  
695 weight and cell viability of *IDH1* and *IDH2*-wildtype chondrosarcoma. (A) Relative tumor  
696 weight of xenografted *IDH1* and *IDH2*-wildtype chondrosarcoma tumors at the time of  
697 harvest. (B) Relative proliferation rate of each *IDH1* and *IDH2*-wildtype tumor  
698 determined by percentage of KI67 positive cells. (C) Relative apoptotic rate of each  
699 *IDH1/2*<sup>WT</sup> tumor determined by percentage of cleaved caspase 3 positive cells.  
700 mean±95% CI are shown. Significance was determined by unpaired student t-test.

701

702 Supplementary Fig 5: Supplementing non-essential amino acids did not rescue defects in  
703 hypertrophic chondrocyte differentiation in *Col2a1Cre;Gls<sup>fl/fl</sup>;Idh1<sup>LSL/+</sup>* metatarsal organ  
704 culture. (A) Immunohistochemistry of Col X of metatarsal organ culture at E16.5. (B)  
705 Quantification of the length of Col X positive zone in metatarsal organ culture.  
706 mean±SEM are shown. \*\*\*\*p<0.0001 (ANOVA)

707

708

- 709 1. Walden, M.J., M.D. Murphey, and J.A. Vidal, *Incidental enchondromas of the knee*.  
710 American Journal of Roentgenology, 2008. **190**(6): p. 1611-1615.
- 711 2. Hong, E.D., et al., *Prevalence of shoulder enchondromas on routine MR imaging*. Clinical  
712 imaging, 2011. **35**(5): p. 378-384.
- 713 3. Bovée, J.V.M.G., et al., *Cartilage tumours and bone development: molecular pathology  
714 and possible therapeutic targets*. Nat Rev Cancer, 2010. **10**(7): p. 481-488.
- 715 4. Qasem, S.A. and B.R. DeYoung, *Cartilage-forming tumors*. Semin Diagn Pathol, 2014.  
716 **31**(1): p. 10-20.
- 717 5. Angelini, A., et al., *Clinical outcome of central conventional chondrosarcoma*. Journal of  
718 Surgical Oncology, 2012. **106**(8): p. 929-937.
- 719 6. Amary, M.F., et al., *Ollier disease and Maffucci syndrome are caused by somatic mosaic  
720 mutations of IDH1 and IDH2*. Nature genetics, 2011. **43**(12): p. 1262-1265.
- 721 7. Amary, M.F., et al., *IDH1 and IDH2 mutations are frequent events in central  
722 chondrosarcoma and central and periosteal chondromas but not in other mesenchymal  
723 tumours*. J Pathol, 2011. **224**(3): p. 334-43.
- 724 8. Pansuriya, T.C., et al., *Somatic mosaic IDH1 and IDH2 mutations are associated with  
725 enchondroma and spindle cell hemangioma in Ollier disease and Maffucci syndrome*. Nat  
726 Genet, 2011. **43**(12): p. 1256-61.
- 727 9. Meijer, D., et al., *Genetic characterization of mesenchymal, clear cell, and  
728 dedifferentiated chondrosarcoma*. Genes Chromosomes Cancer, 2012. **51**(10): p. 899-  
729 909.
- 730 10. Zhang, H. and B.A. Alman, *Enchondromatosis and Growth Plate Development*. Current  
731 Osteoporosis Reports, 2021. **19**(1): p. 40-49.
- 732 11. Dang, L., et al., *Cancer-associated IDH1 mutations produce 2-hydroxyglutarate*. Nature,  
733 2009. **462**(7274): p. 739-744.
- 734 12. Zhao, S., et al., *Glioma-derived mutations in IDH1 dominantly inhibit IDH1 catalytic  
735 activity and induce HIF-1alpha*. Science, 2009. **324**(5924): p. 261-5.
- 736 13. Leonardi, R., et al., *Cancer-associated isocitrate dehydrogenase mutations inactivate  
737 NADPH-dependent reductive carboxylation*. J Biol Chem, 2012. **287**(18): p. 14615-20.
- 738 14. Yang, M., T. Soga, and P.J. Pollard, *Oncometabolites: linking altered metabolism with  
739 cancer*. J Clin Invest, 2013. **123**(9): p. 3652-8.
- 740 15. Chowdhury, R., et al., *The oncometabolite 2-hydroxyglutarate inhibits histone lysine  
741 demethylases*. EMBO Rep, 2011. **12**(5): p. 463-9.
- 742 16. Xu, W., et al., *Oncometabolite 2-Hydroxyglutarate Is a Competitive Inhibitor of  $\alpha$ -  
743 Ketoglutarate-Dependent Dioxygenases*. Cancer cell, 2011. **19**(1): p. 17-30.
- 744 17. Lu, C., et al., *IDH mutation impairs histone demethylation and results in a block to cell  
745 differentiation*. Nature, 2012. **483**(7390): p. 474-8.
- 746 18. Turcan, S., et al., *IDH1 mutation is sufficient to establish the glioma hypermethylator  
747 phenotype*. Nature, 2012. **483**(7390): p. 479-83.

- 748 19. Figueroa, M.E., et al., *Leukemic IDH1 and IDH2 mutations result in a hypermethylation*  
749 *phenotype, disrupt TET2 function, and impair hematopoietic differentiation*. *Cancer cell*,  
750 2010. **18**(6): p. 553-567.
- 751 20. Jin, Y., et al., *Mutant IDH1 Dysregulates the Differentiation of Mesenchymal Stem Cells in*  
752 *Association with Gene-Specific Histone Modifications to Cartilage- and Bone-Related*  
753 *Genes*. *PLoS One*, 2015. **10**(7): p. e0131998.
- 754 21. Suijker, J., et al., *Inhibition of mutant IDH1 decreases D-2-HG levels without affecting*  
755 *tumorigenic properties of chondrosarcoma cell lines*. *Oncotarget*, 2015. **6**(14): p. 12505-  
756 19.
- 757 22. Cojocaru, E., et al., *Is the IDH Mutation a Good Target for Chondrosarcoma Treatment?*  
758 *Current Molecular Biology Reports*, 2020. **6**(1): p. 1-9.
- 759 23. Cojocaru, E., et al., *Is the IDH Mutation a Good Target for Chondrosarcoma Treatment?*  
760 *Current Molecular Biology Reports*, 2020.
- 761 24. Pathmanapan, S., et al., *Mutant IDH and non-mutant chondrosarcomas display distinct*  
762 *cellular metabolomes*. *Cancer Metab*, 2021. **9**(1): p. 13.
- 763 25. Wise, D.R. and C.B. Thompson, *Glutamine addiction: a new therapeutic target in cancer*.  
764 *Trends in biochemical sciences*, 2010. **35**(8): p. 427-433.
- 765 26. Altman, B.J., Z.E. Stine, and C.V. Dang, *From Krebs to clinic: glutamine metabolism to*  
766 *cancer therapy*. *Nat Rev Cancer*, 2016. **16**(10): p. 619-34.
- 767 27. Yu, Y., et al., *Glutamine Metabolism Regulates Proliferation and Lineage Allocation in*  
768 *Skeletal Stem Cells*. *Cell Metabolism*, 2019. **29**(4): p. 966-978.e4.
- 769 28. Stegen, S., et al., *Glutamine Metabolism Controls Chondrocyte Identity and Function*.  
770 *Dev Cell*, 2020. **53**(5): p. 530-544.e8.
- 771 29. Crawford, J. and H.J. Cohen, *The essential role of L -glutamine in lymphocyte*  
772 *differentiation in vitro*. *Journal of cellular physiology*, 1985. **124**(2): p. 275-282.
- 773 30. Johnson, M.O., et al., *Distinct regulation of Th17 and Th1 cell differentiation by*  
774 *glutaminase-dependent metabolism*. *Cell*, 2018. **175**(7): p. 1780-1795. e19.
- 775 31. Wang, Y., et al., *Glutaminase 1 is essential for the differentiation, proliferation, and*  
776 *survival of human neural progenitor cells*. *Stem cells and development*, 2014. **23**(22): p.  
777 2782-2790.
- 778 32. Izquierdo-Garcia, J.L., et al., *IDH1 mutation induces reprogramming of pyruvate*  
779 *metabolism*. *Cancer research*, 2015. **75**(15): p. 2999-3009.
- 780 33. Salamanca-Cardona, L., et al., *In vivo imaging of glutamine metabolism to the*  
781 *oncometabolite 2-hydroxyglutarate in IDH1/2 mutant tumors*. *Cell metabolism*, 2017.  
782 **26**(6): p. 830-841. e3.
- 783 34. Seltzer, M.J., et al., *Inhibition of glutaminase preferentially slows growth of glioma cells*  
784 *with mutant IDH1*. *Cancer Res*, 2010. **70**(22): p. 8981-7.
- 785 35. Matre, P., et al., *Inhibiting glutaminase in acute myeloid leukemia: metabolic*  
786 *dependency of selected AML subtypes*. *Oncotarget*, 2016. **7**(48): p. 79722-79735.

- 787 36. Peterse, E.F.P., et al., *Targeting glutaminolysis in chondrosarcoma in context of the*  
788 *IDH1/2 mutation*. British Journal of Cancer, 2018. **118**(8): p. 1074-1083.
- 789 37. Emadi, A., et al., *Inhibition of glutaminase selectively suppresses the growth of primary*  
790 *acute myeloid leukemia cells with IDH mutations*. Experimental Hematology, 2014.  
791 **42**(4): p. 247-251.
- 792 38. Stegen, S., et al., *Glutamine Metabolism in Osteoprogenitors Is Required for Bone Mass*  
793 *Accrual and PTH-Induced Bone Anabolism in Male Mice*. Journal of Bone and Mineral  
794 Research, 2021. **36**(3): p. 604-616.
- 795 39. Sharma, D., et al., *SLC1A5 provides glutamine and asparagine necessary for bone*  
796 *development in mice*. bioRxiv, 2021.
- 797 40. Nicolle, R., et al., *Integrated molecular characterization of chondrosarcoma reveals*  
798 *critical determinants of disease progression*. Nat Commun, 2019. **10**(1): p. 4622.
- 799 41. Hirata, M., et al., *Mutant IDH is sufficient to initiate enchondromatosis in mice*.  
800 Proceedings of the National Academy of Sciences, 2015. **112**(9): p. 2829-2834.
- 801 42. Liao, Y., et al., *Isolation and Culture of Murine Primary Chondrocytes: Costal and Growth*  
802 *Plate Cartilage*, in *Skeletal Development and Repair: Methods and Protocols*, M.J. Hilton,  
803 Editor. 2021, Springer US: New York, NY. p. 415-423.
- 804 43. Mingote, S., et al., *Genetic Pharmacotherapy as an Early CNS Drug Development*  
805 *Strategy: Testing Glutaminase Inhibition for Schizophrenia Treatment in Adult Mice*.  
806 Front Syst Neurosci, 2015. **9**: p. 165.
- 807 44. Long, F., et al., *Genetic manipulation of hedgehog signaling in the endochondral skeleton*  
808 *reveals a direct role in the regulation of chondrocyte proliferation*. Development, 2001.  
809 **128**(24): p. 5099-108.
- 810 45. Robinson, Mary M., et al., *Novel mechanism of inhibition of rat kidney-type glutaminase*  
811 *by bis-2-(5-phenylacetamido-1,2,4-thiadiazol-2-yl)ethyl sulfide (BPTES)*. Biochemical  
812 Journal, 2007. **406**(3): p. 407-414.
- 813 46. Campbell, V.T., et al., *Hedgehog Pathway Inhibition in Chondrosarcoma Using the*  
814 *Smoothened Inhibitor IPI-926 Directly Inhibits Sarcoma Cell Growth*. Molecular Cancer  
815 Therapeutics, 2014. **13**(5): p. 1259-1269.
- 816 47. Sullivan, L.B., et al., *Supporting Aspartate Biosynthesis Is an Essential Function of*  
817 *Respiration in Proliferating Cells*. Cell, 2015. **162**(3): p. 552-63.
- 818 48. Birsoy, K., et al., *An Essential Role of the Mitochondrial Electron Transport Chain in Cell*  
819 *Proliferation Is to Enable Aspartate Synthesis*. Cell, 2015. **162**(3): p. 540-51.
- 820 49. Qing, G., et al., *ATF4 Regulates *MYC*-Mediated Neuroblastoma Cell Death*  
821 *upon Glutamine Deprivation*. Cancer Cell, 2012. **22**(5): p. 631-644.
- 822 50. Ye, J., et al., *The GCN2-ATF4 pathway is critical for tumour cell survival and proliferation*  
823 *in response to nutrient deprivation*. The EMBO Journal, 2010. **29**(12): p. 2082-2096.
- 824 51. Zhang, J., et al., *Asparagine Plays a Critical Role in Regulating Cellular Adaptation to*  
825 *Glutamine Depletion*. Molecular Cell, 2014. **56**(2): p. 205-218.

- 826 52. Alkan, H.F., et al., *Cytosolic Aspartate Availability Determines Cell Survival When*  
827 *Glutamine Is Limiting*. *Cell Metabolism*, 2018. **28**(5): p. 706-720.e6.
- 828 53. Chen, M., et al., *Generation of a transgenic mouse model with chondrocyte-specific and*  
829 *tamoxifen-inducible expression of Cre recombinase*. *Genesis*, 2007. **45**(1): p. 44-50.
- 830 54. Shultz, L.D., et al., *Human lymphoid and myeloid cell development in NOD/LtSz-scid IL2R*  
831 *gamma null mice engrafted with mobilized human hemopoietic stem cells*. *J Immunol*,  
832 2005. **174**(10): p. 6477-89.
- 833 55. Zhang, H., et al., *Intracellular cholesterol biosynthesis in enchondroma and*  
834 *chondrosarcoma*. *JCI Insight*, 2019. **5**.
- 835



Fig 1

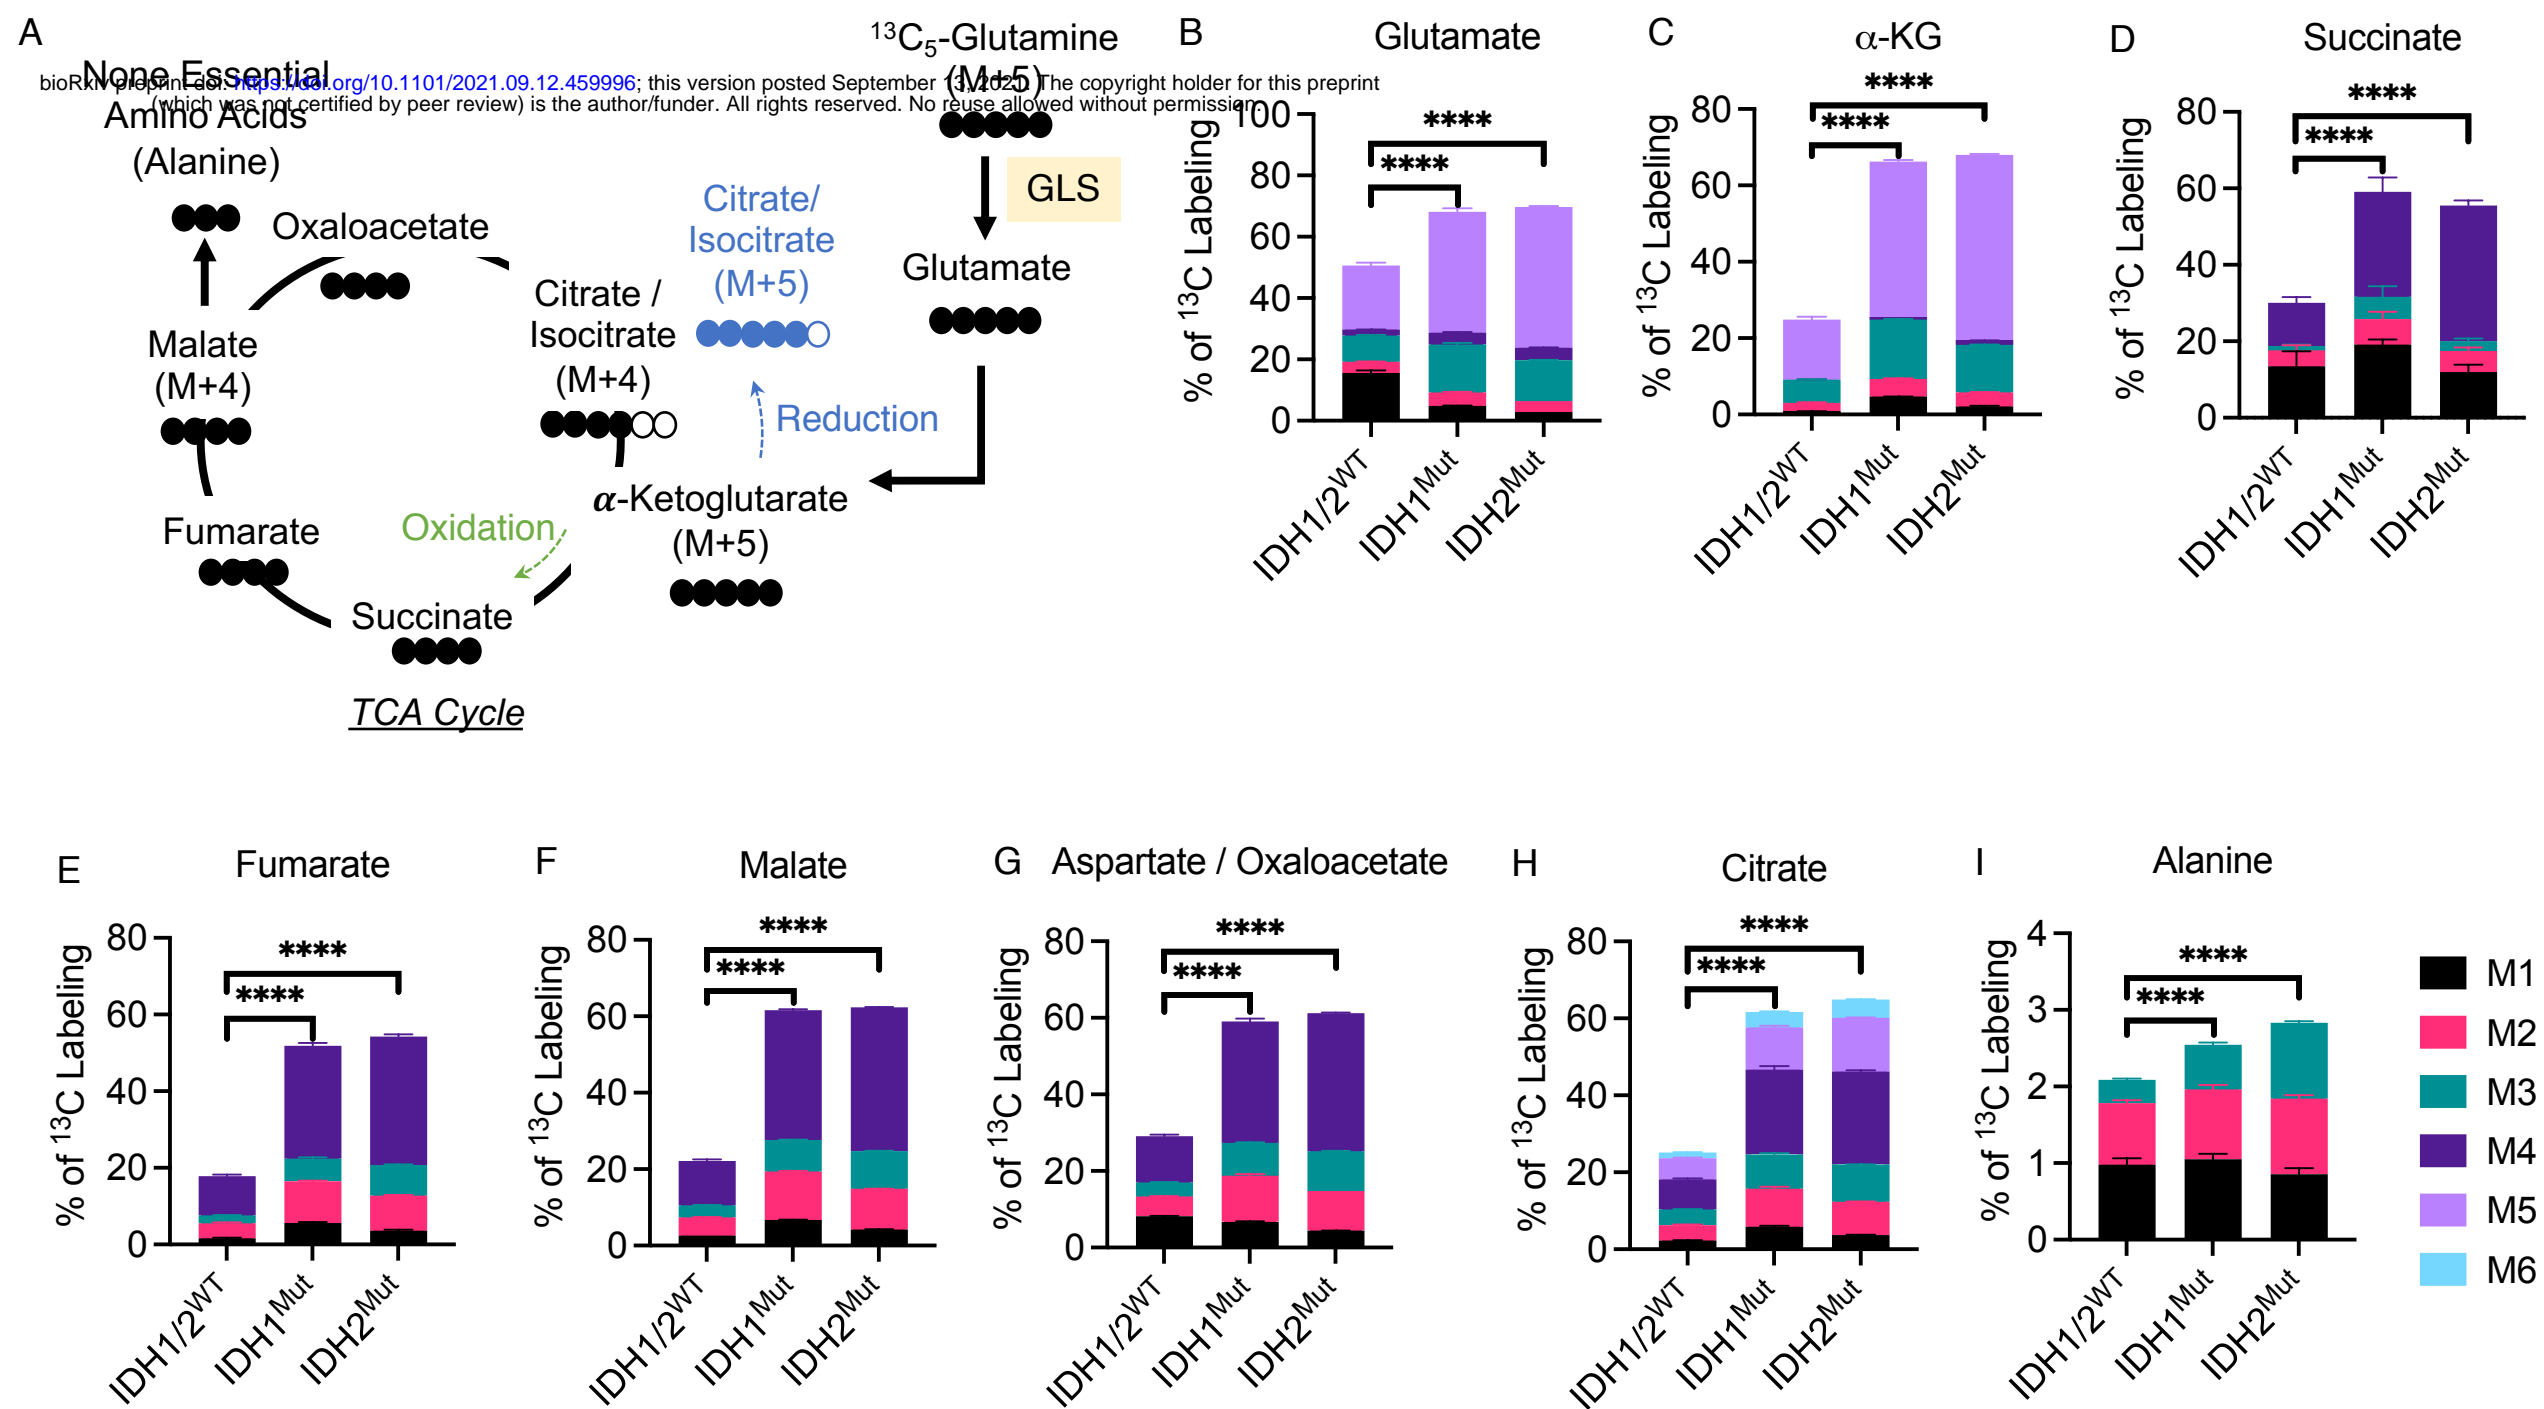

Fig 2

bioRxiv preprint doi: <https://doi.org/10.1101/2021.09.12.459996>; this version posted September 13, 2021. The copyright holder for this preprint (which was not certified by peer review) is the author/funder. All rights reserved. No reuse allowed without permission.

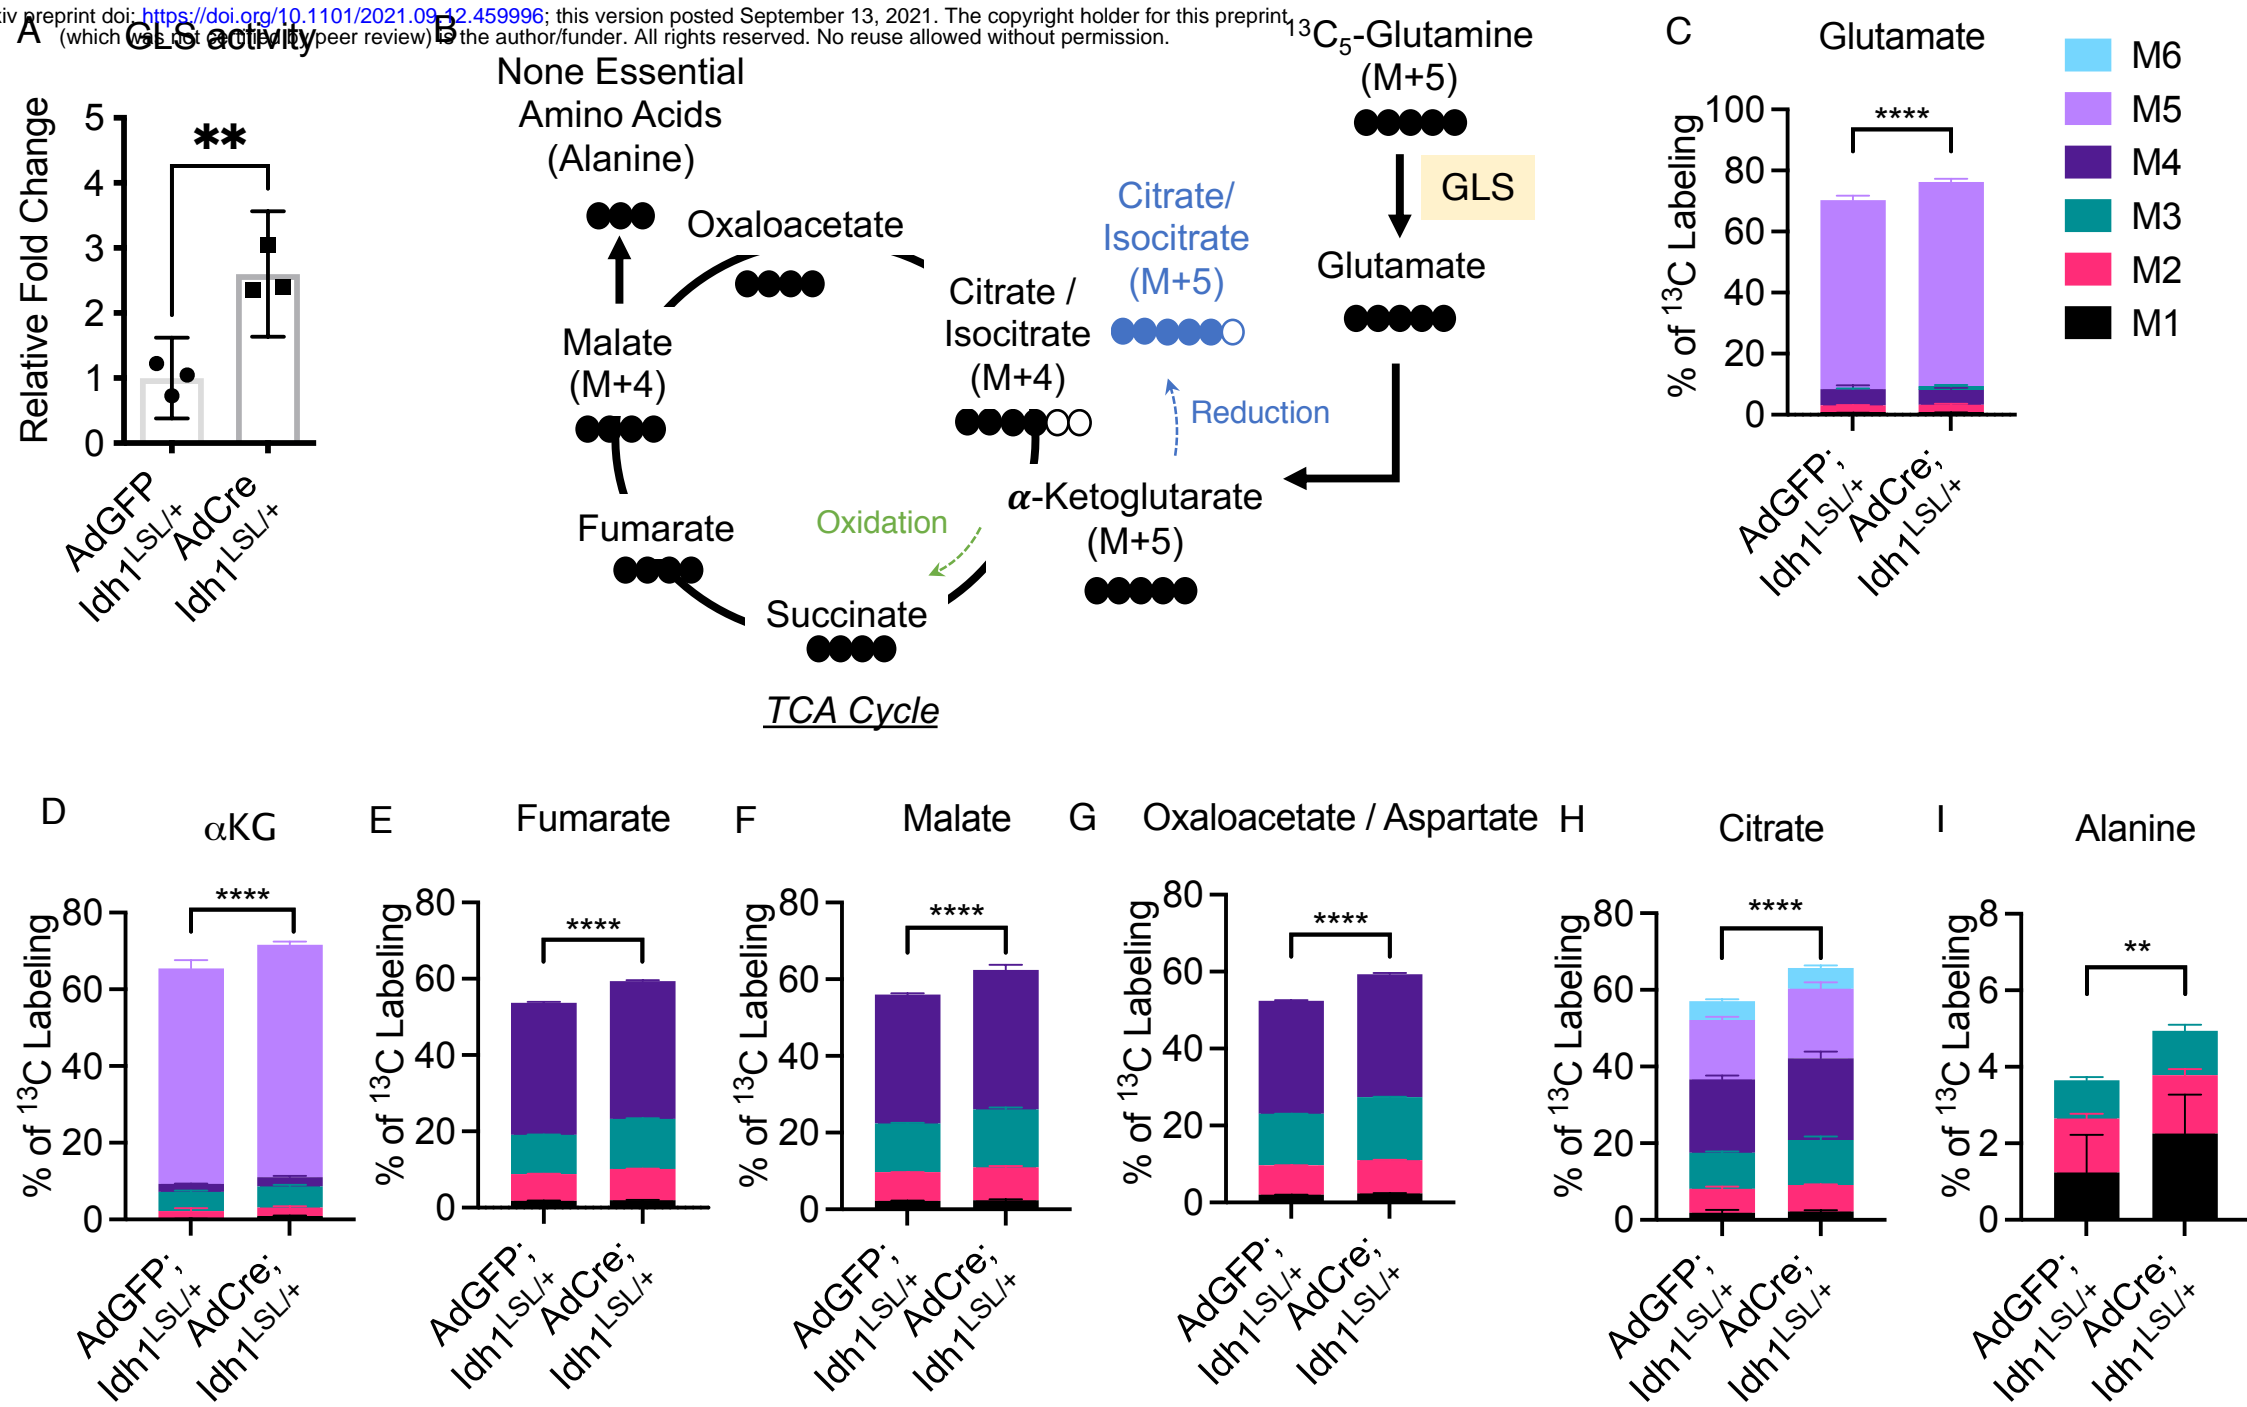

Fig 3

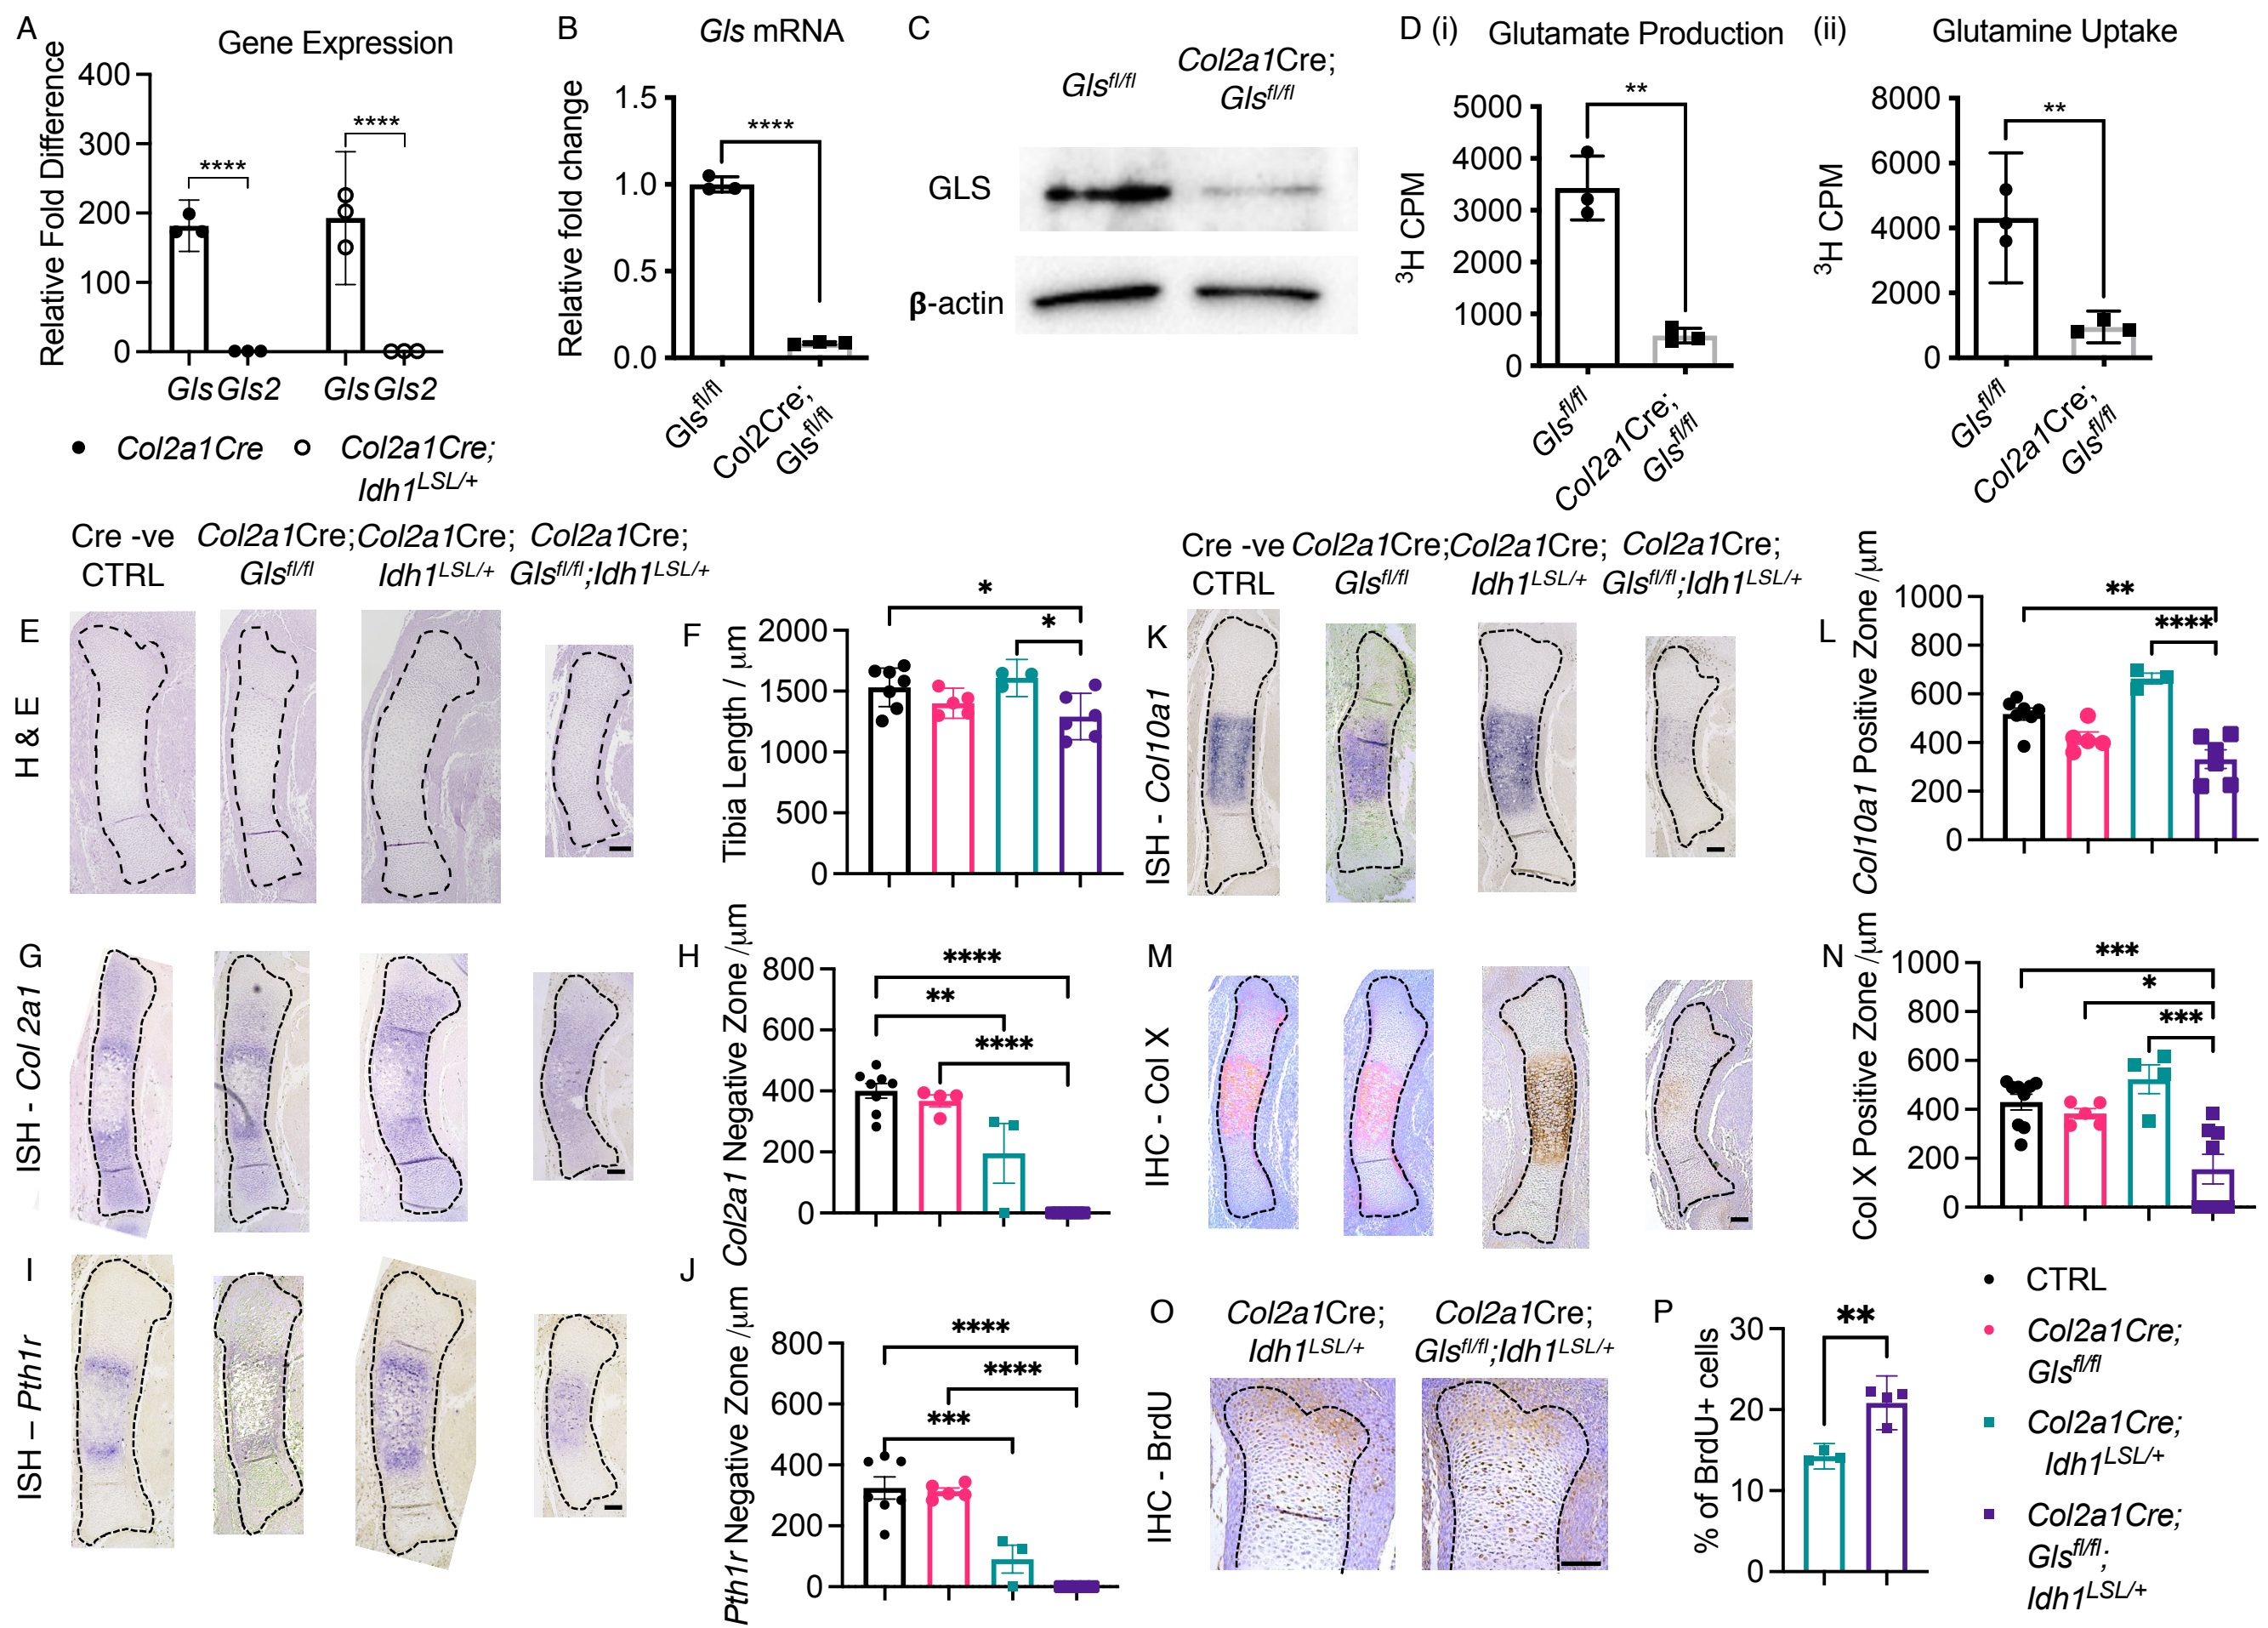

Fig 4

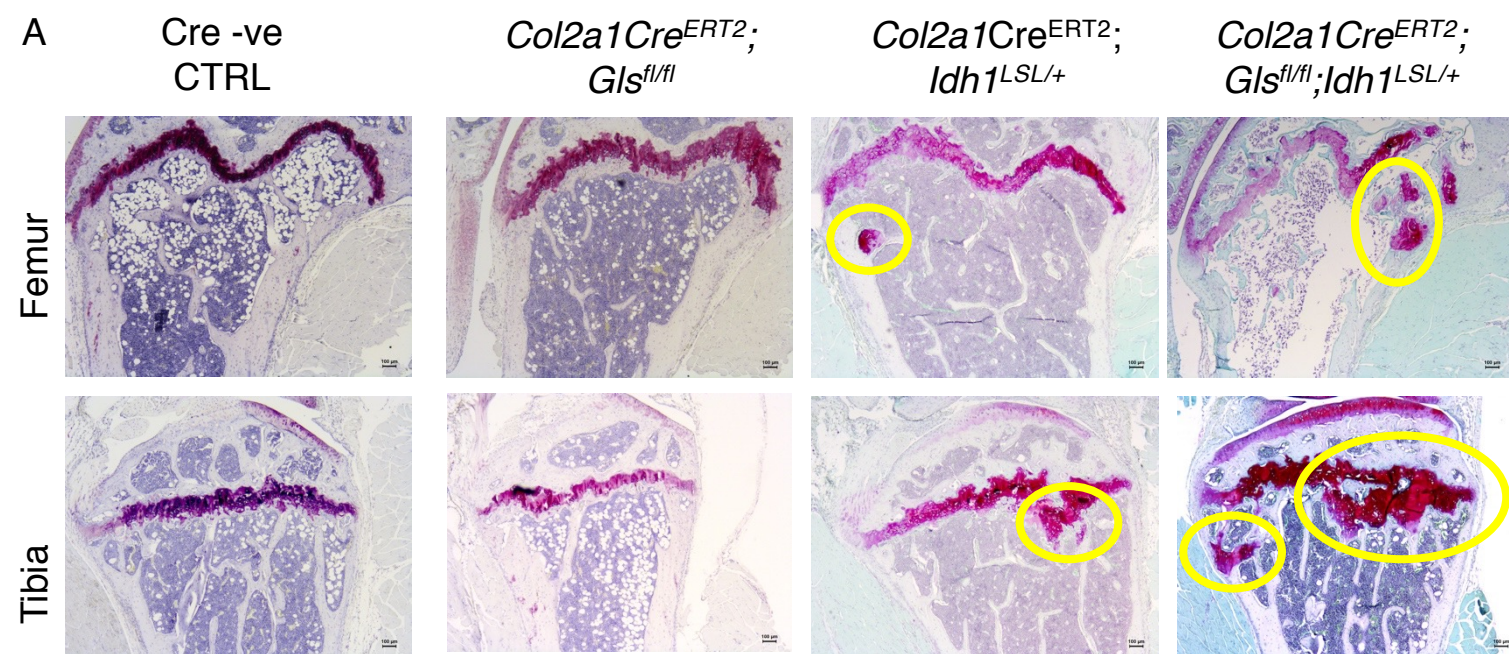

**B** Trabecular Bone Volume

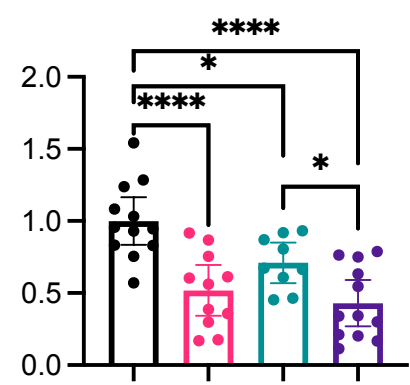

**C** Lesion Size

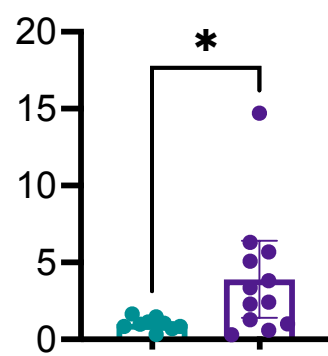

**D** Number of Lesions

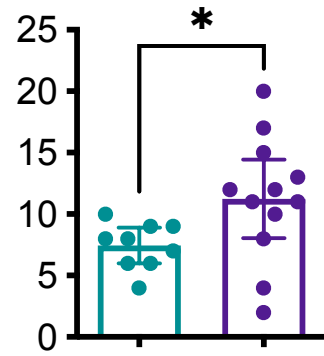

- Cre -ve CTRL
- *Col2Cre<sup>ERT2</sup>;*  
*Gls<sup>fl/fl</sup>*
- *Col2Cre<sup>ERT2</sup>;*  
*Idh1<sup>LSL/wt</sup>*
- *Col2Cre<sup>ERT2</sup>;*  
*Gls<sup>fl/fl</sup>;**Idh1<sup>LSL/wt</sup>*

Fig 5

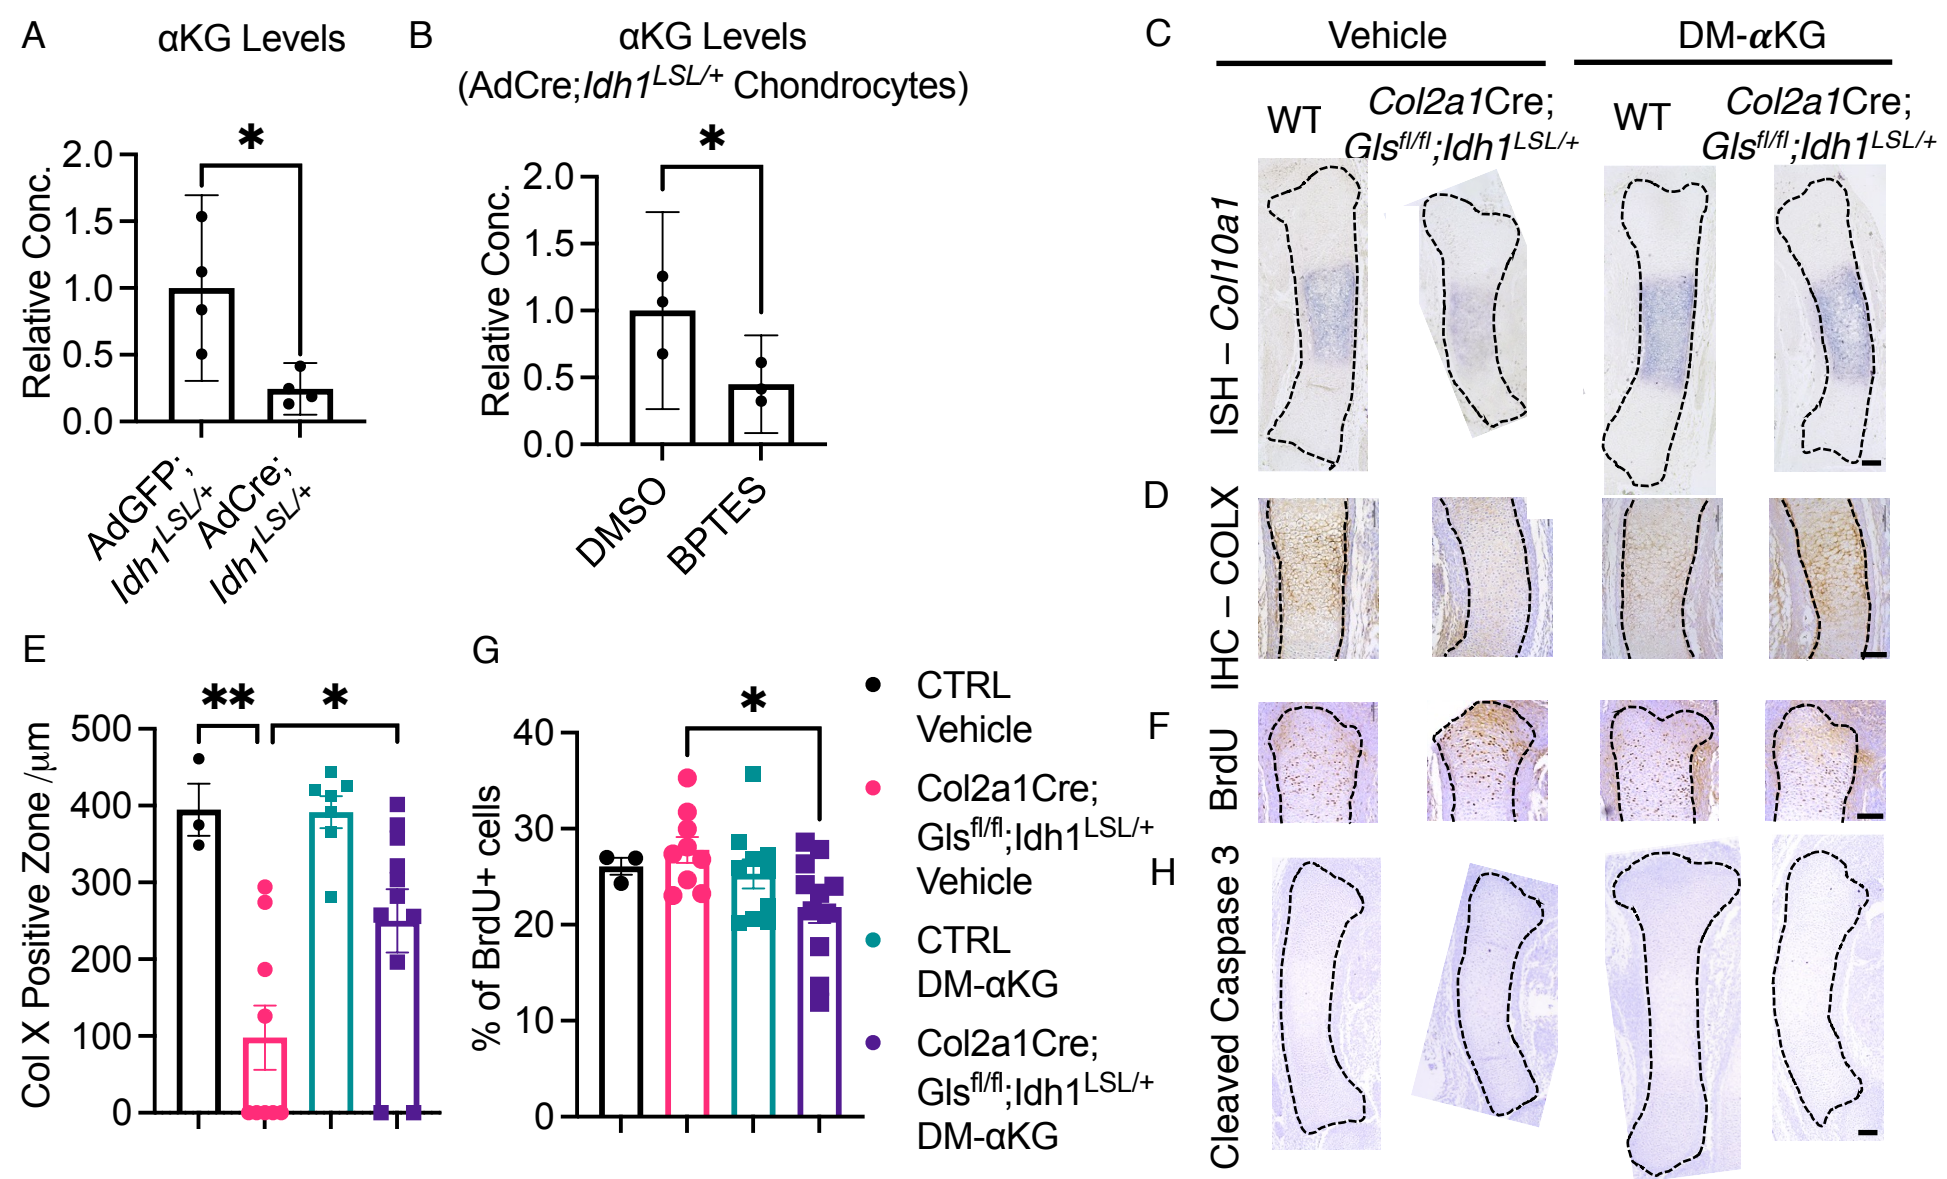

Fig 6

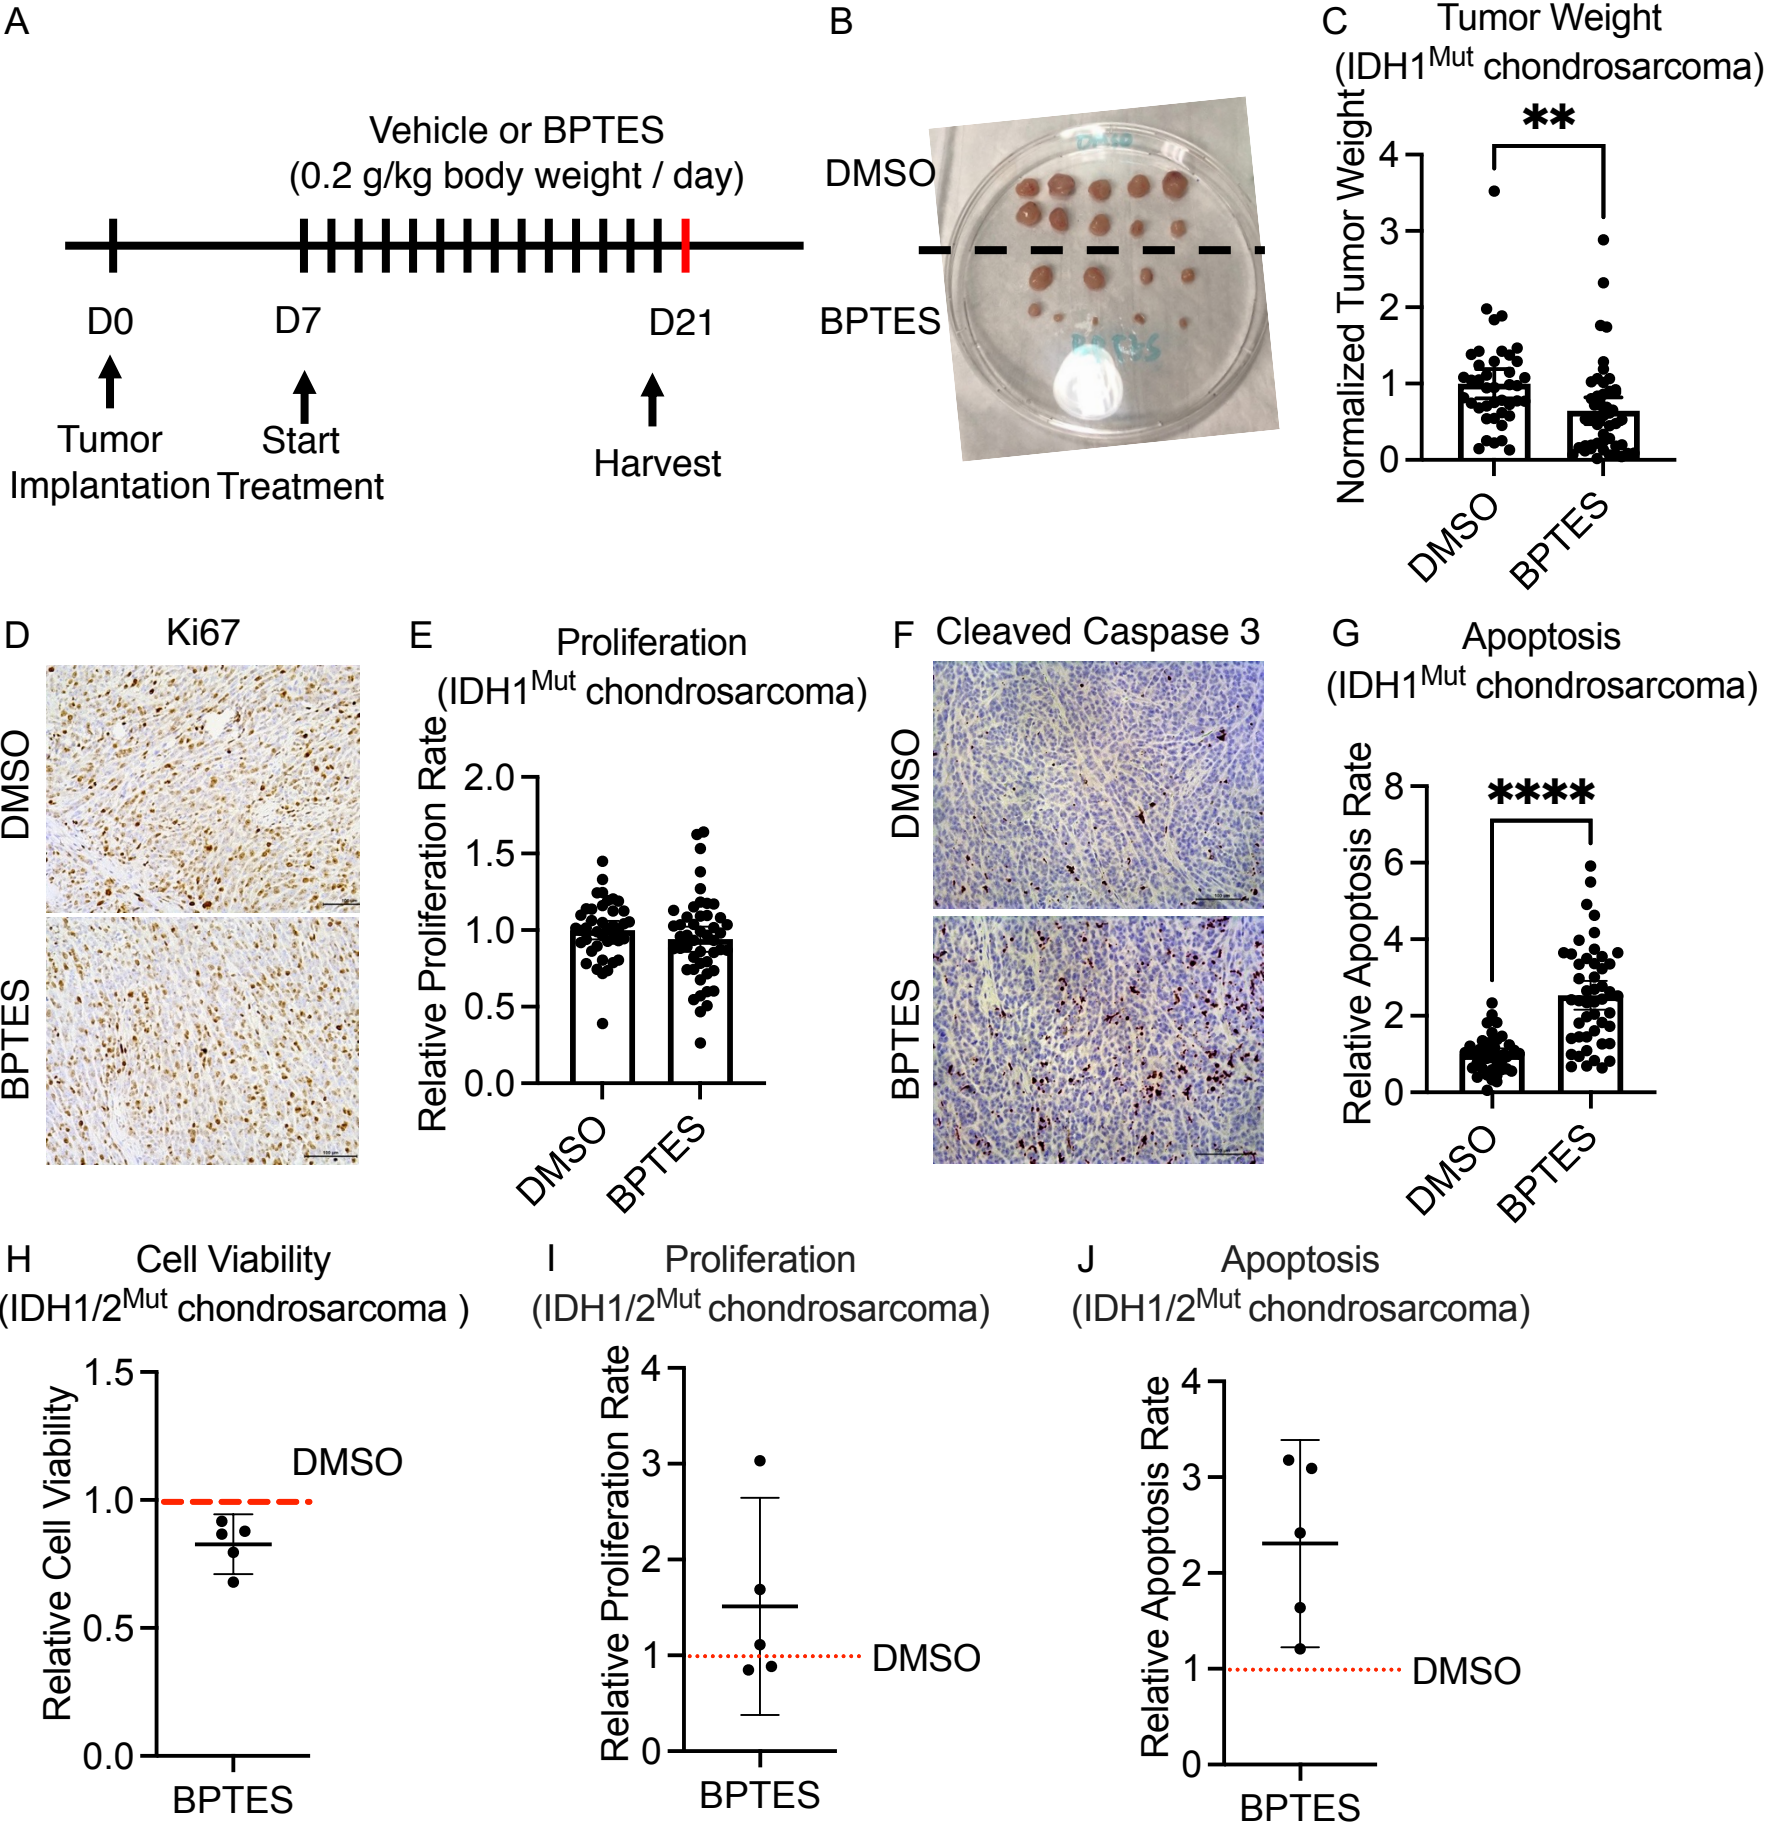

Fig 7

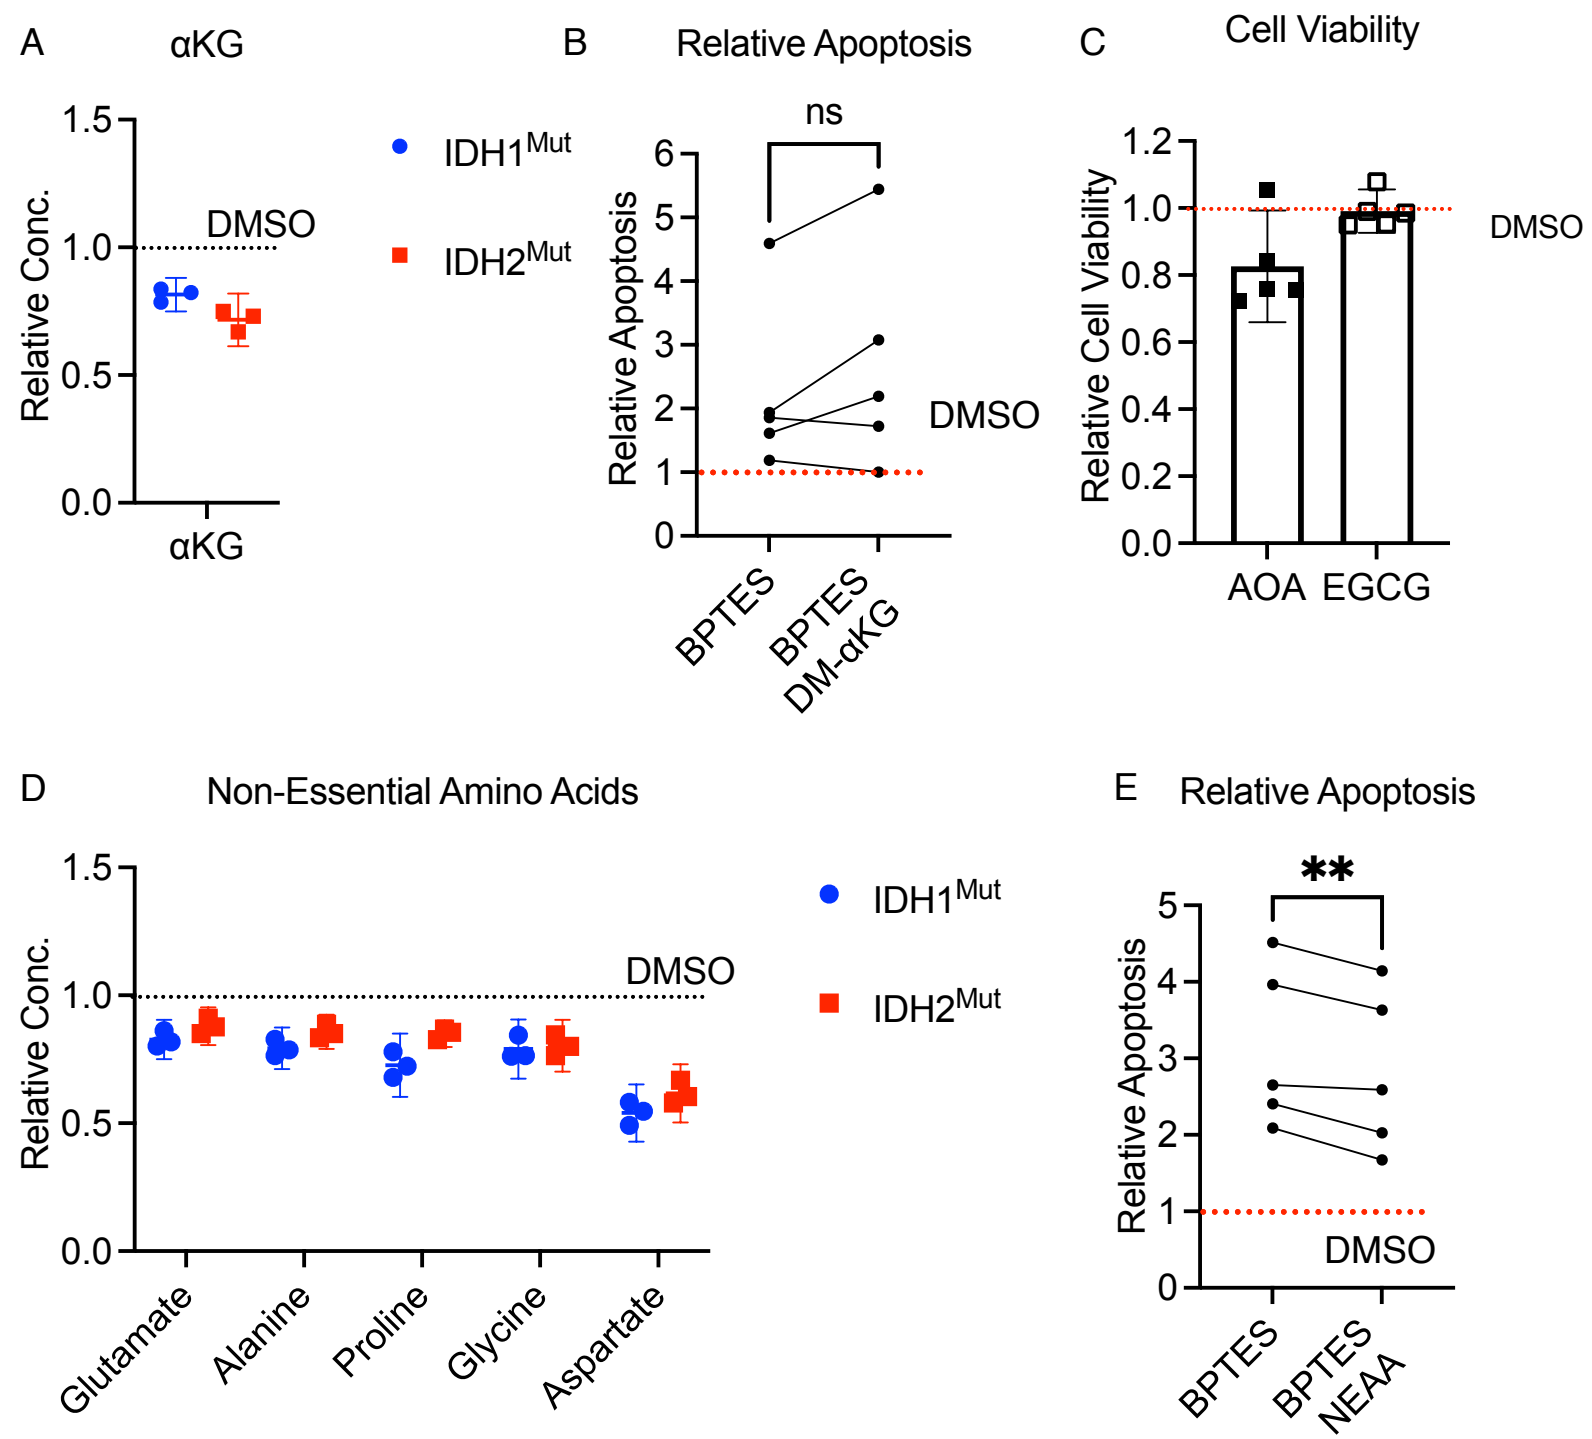

Supplementary Fig 1

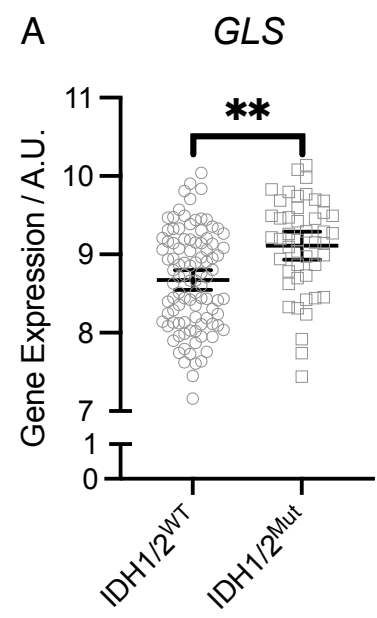



Supplementary Fig 2

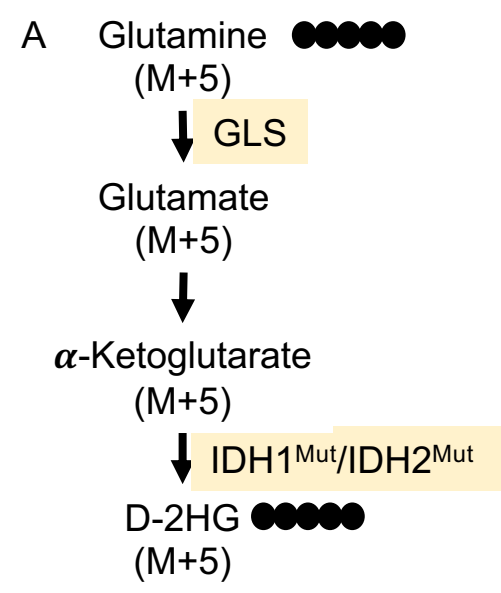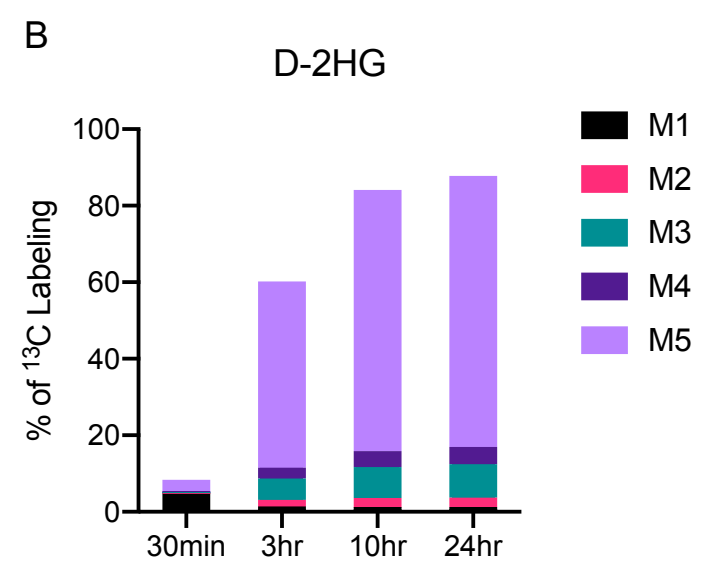

Supplementary Fig 3

A Cre -ve CTRL *Col2a1Cre; Gls<sup>fl/fl</sup>* *Col2a1Cre; Idh1<sup>LSL/+</sup>* *Col2a1Cre; Gls<sup>fl/fl</sup>; Idh1<sup>LSL/+</sup>*

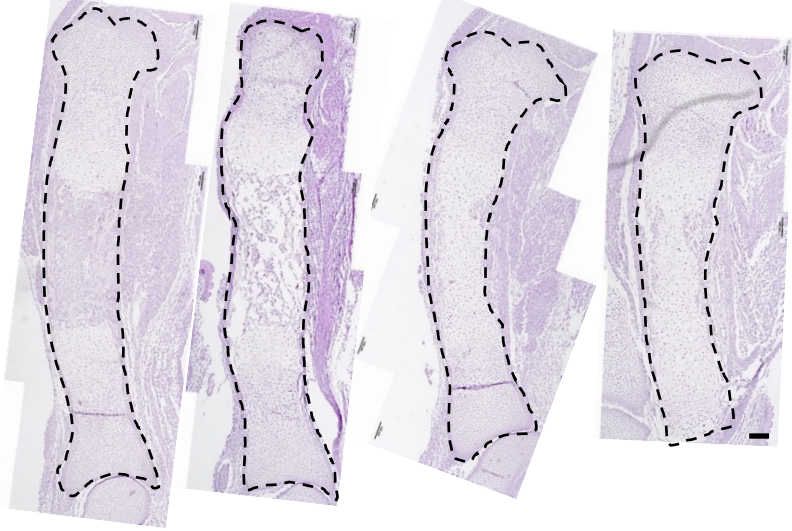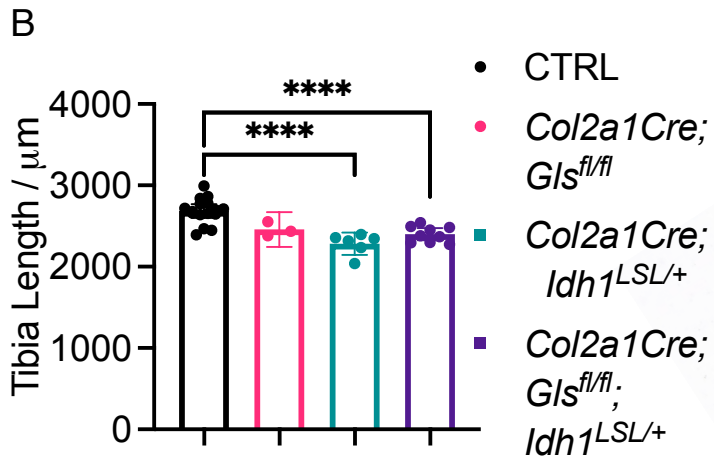

C Cre -ve CTRL *Col2a1Cre; Gls<sup>fl/fl</sup>* *Col2a1Cre; Idh1<sup>LSL/+</sup>* *Col2a1Cre; Gls<sup>fl/fl</sup>; Idh1<sup>LSL/+</sup>*

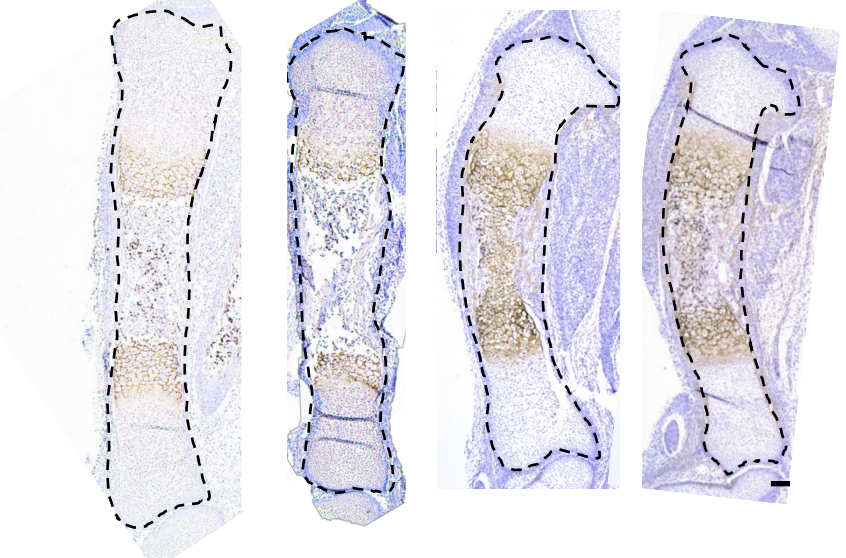

D Cre -ve CTRL *Col2a1Cre; Gls<sup>fl/fl</sup>* *Col2a1Cre; Idh1<sup>LSL/+</sup>* *Col2a1Cre; Gls<sup>fl/fl</sup>; Idh1<sup>LSL/+</sup>*

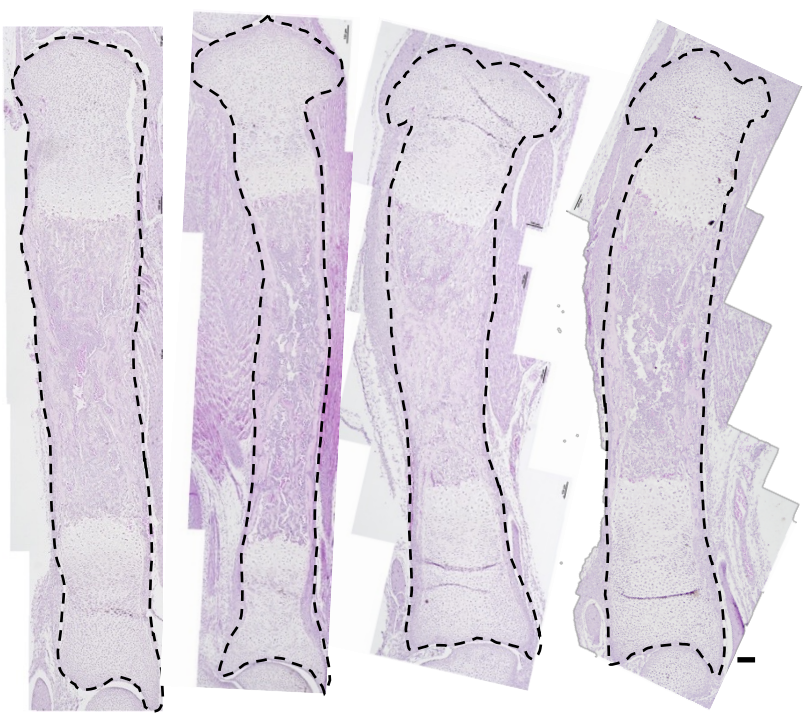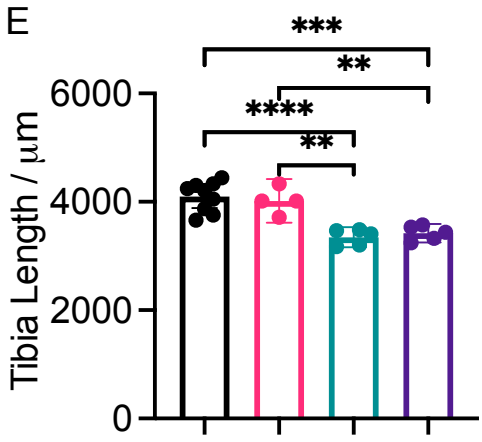

F Cre -ve CTRL *Col2a1Cre; Gls<sup>fl/fl</sup>* *Col2a1Cre; Idh1<sup>LSL/+</sup>* *Col2a1Cre; Gls<sup>fl/fl</sup>; Idh1<sup>LSL/+</sup>*

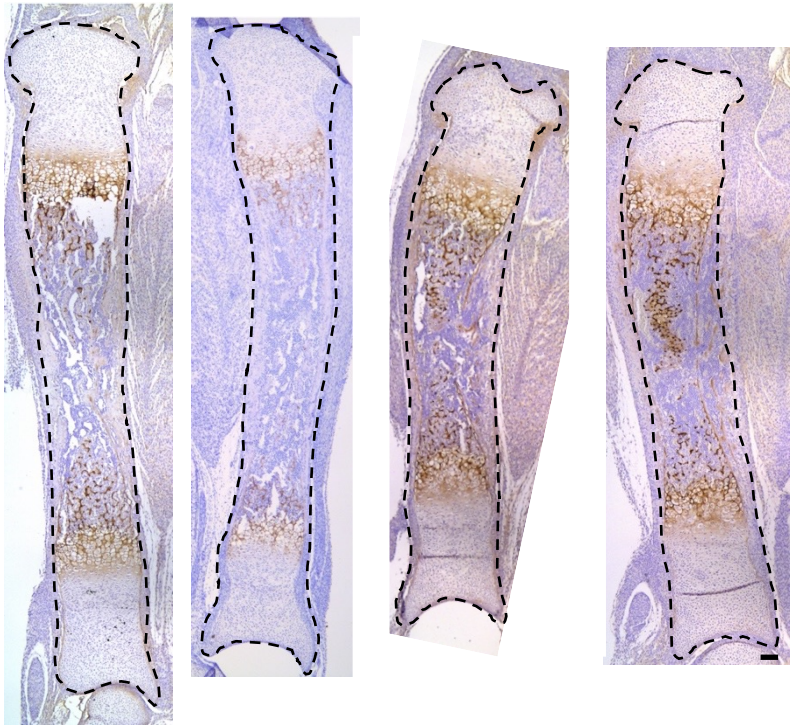

G Cre -ve CTRL *Col2a1Cre; Gls<sup>fl/fl</sup>* *Col2a1Cre; Idh1<sup>LSL/+</sup>* *Col2a1Cre; Gls<sup>fl/fl</sup>; Idh1<sup>LSL/+</sup>*

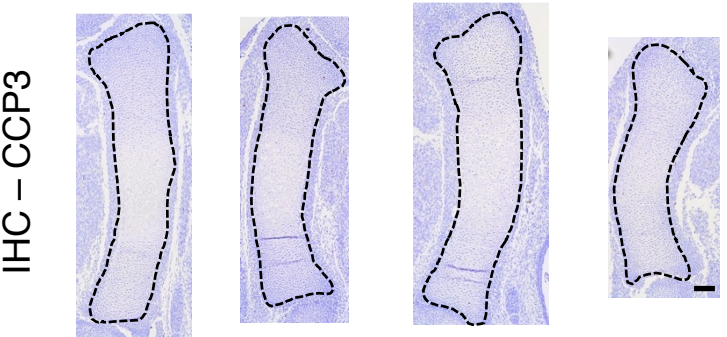

Supplementary Fig 4

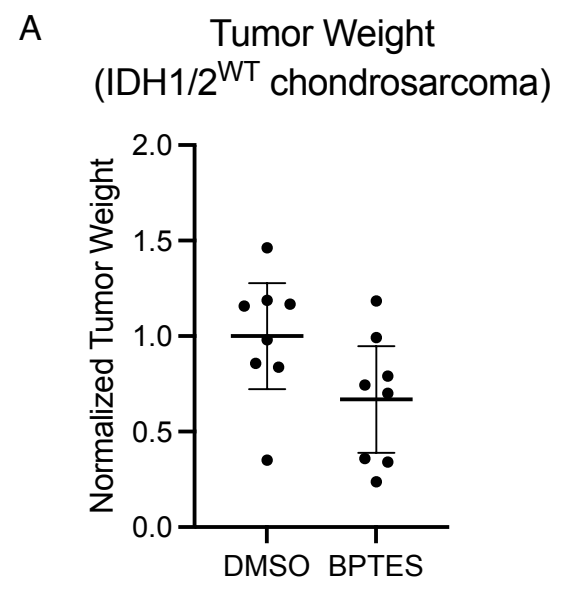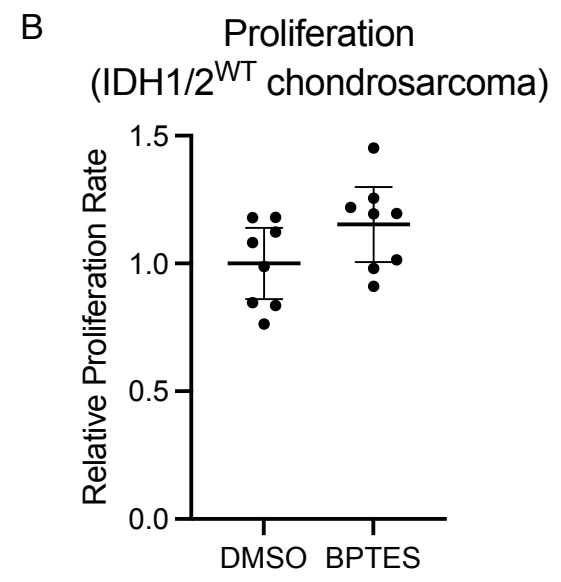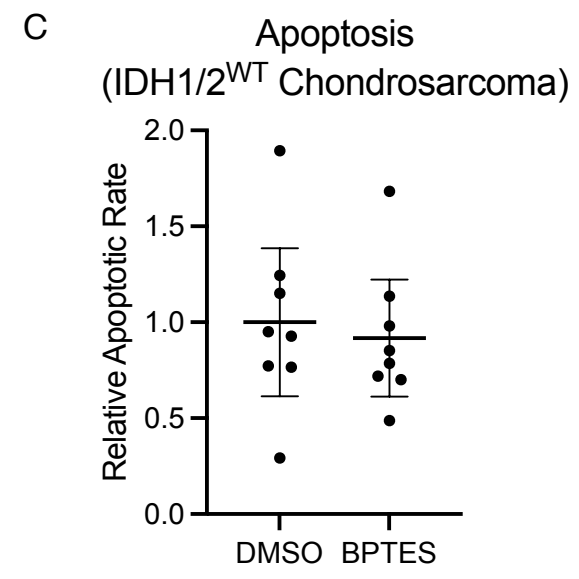

Supplementary Fig 5

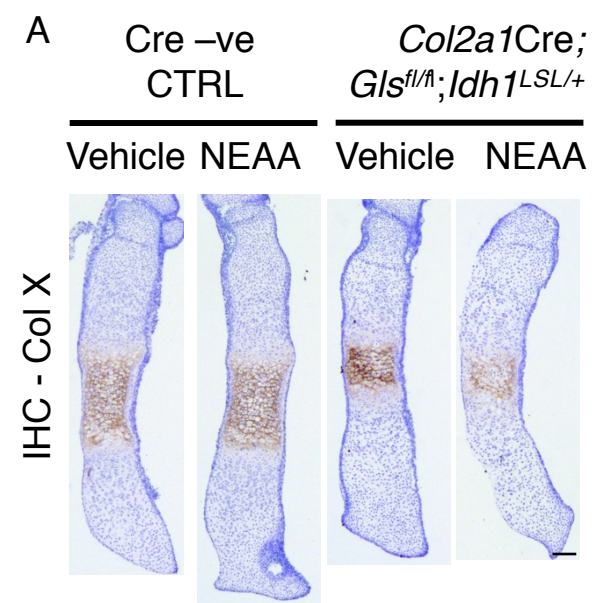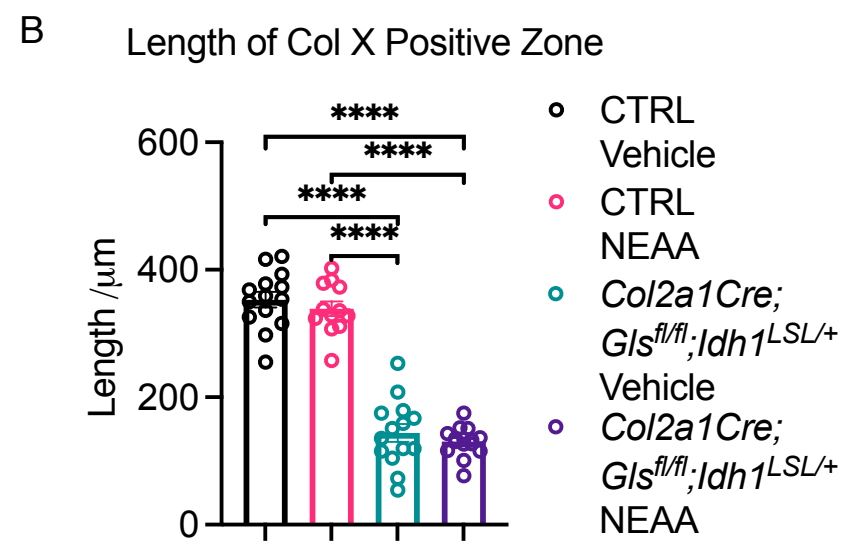

Source: https://biorxiv.org/content/10.1101/2021.09.12.459996v1.full.pdf
